# Supplementary material for: Novel GPR120 Agonists with Improved Pharmacokinetic Profiles for the Treatment of Type 2 Diabetes
Source: MDPI journal article supplement (doi:10.3390/molecules26226907), 2021-11-16
Supplement: s1 [file s1]

## **Novel GPR120 agonists with Improved Pharmacokinetic Profiles for the treatment of type 2 diabetes**

Guoxia Ji <sup>a,b</sup>, Qinghua Guo <sup>a</sup>, Qidi Xue <sup>a</sup>, Ruifang Kong <sup>a</sup>, Shibei Wang <sup>a</sup>, Kang Lei <sup>a</sup>, Renmin Liu <sup>a\*</sup>, and Xuekun Wang <sup>a\*</sup>,

<sup>a</sup> School of Pharmaceutical Sciences, Liaocheng University, 1 Hunan Street, Liaocheng, Shandong 252059, China

<sup>b</sup> School of Chemistry and Chemical Engineering, Liaocheng University, 1 Hunan Street, Liaocheng, Shandong 252059, China

\* Corresponding author. E-mail addresses: wangxuekun@lccu.edu.cn (X. Wang); Tel.: +86-0635-823-9087 (X.W.)

<sup>1</sup>H-NMR, <sup>13</sup>C-NMR, and HRMS of target compounds

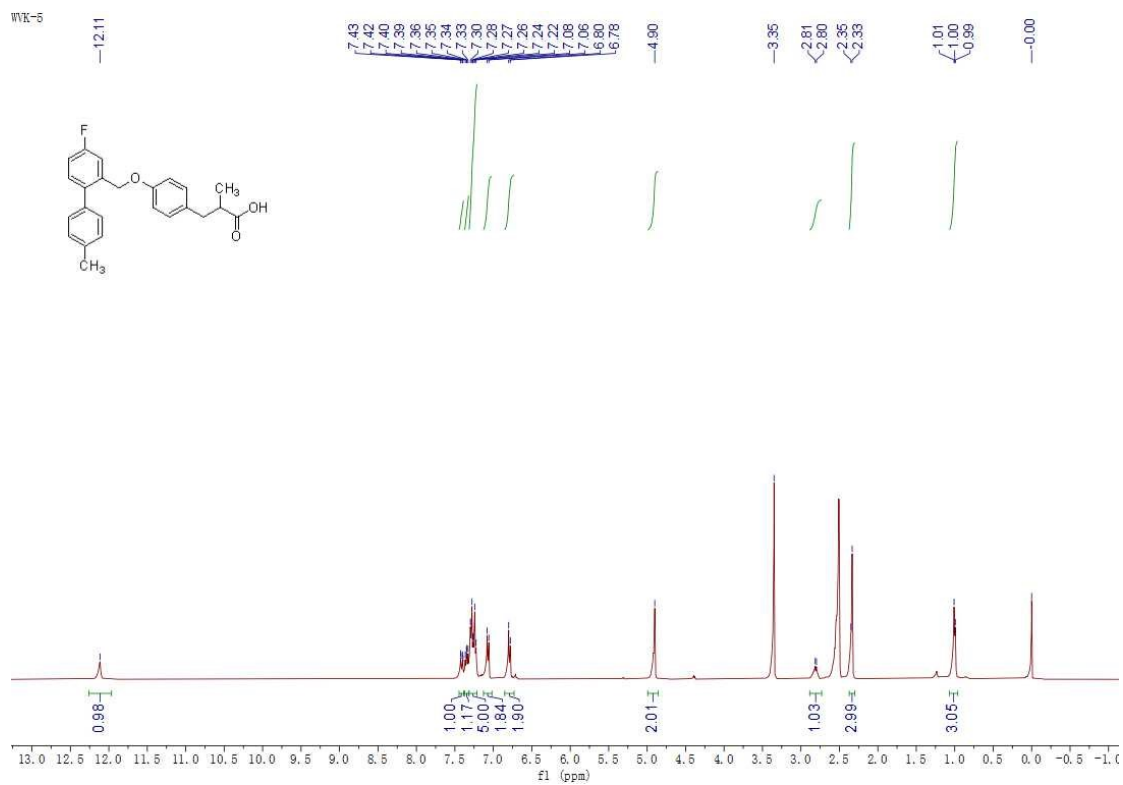

**Figure S1.** <sup>1</sup>H NMR spectrum **1f**.

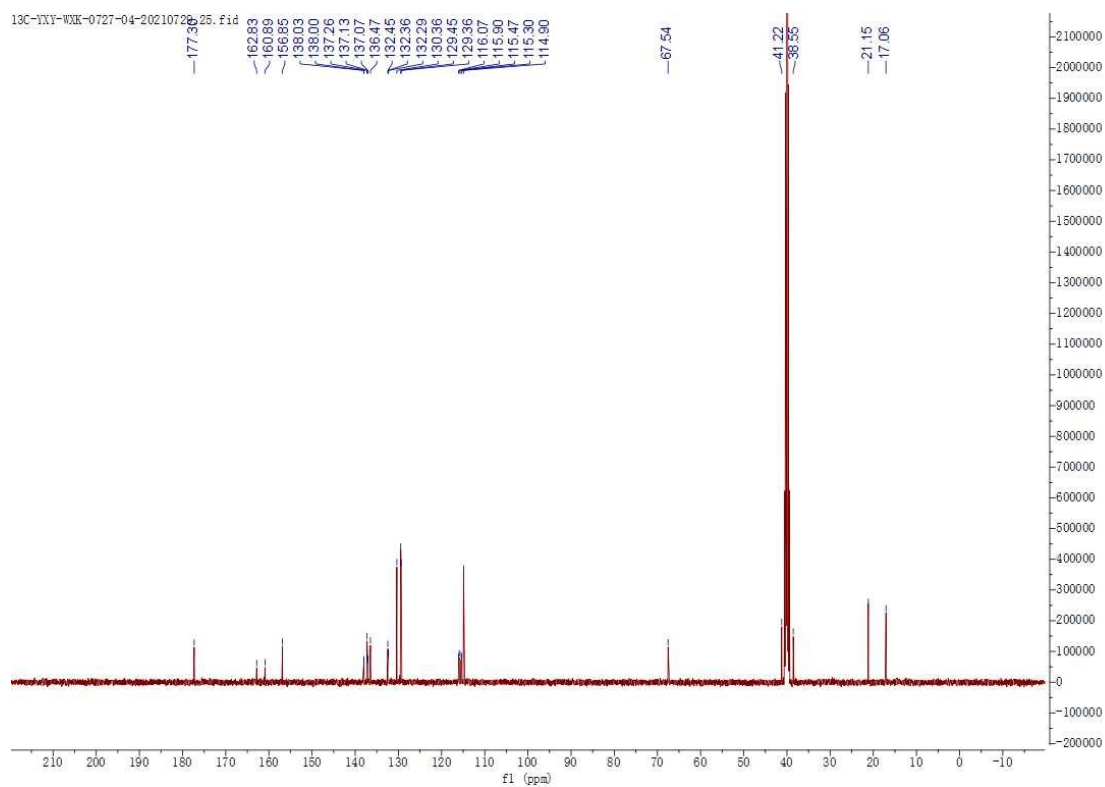

**Figure S2.** <sup>13</sup>C NMR spectrum **1f**.

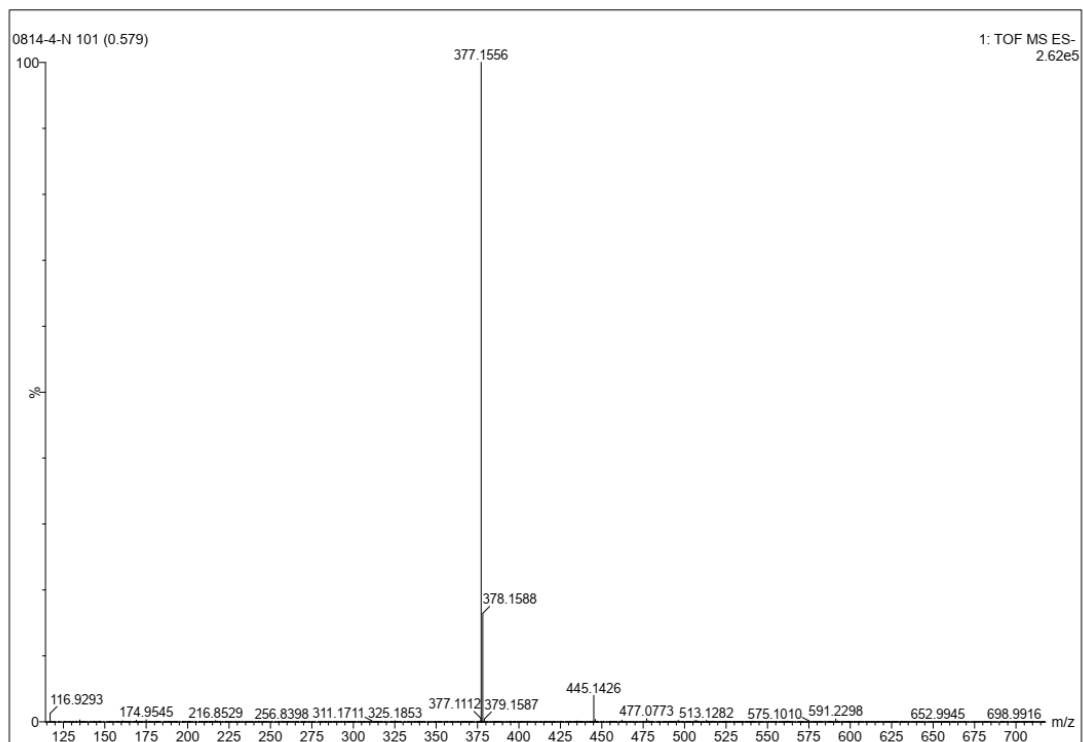

**Figure S3.** HRMS spectrum **1f**.

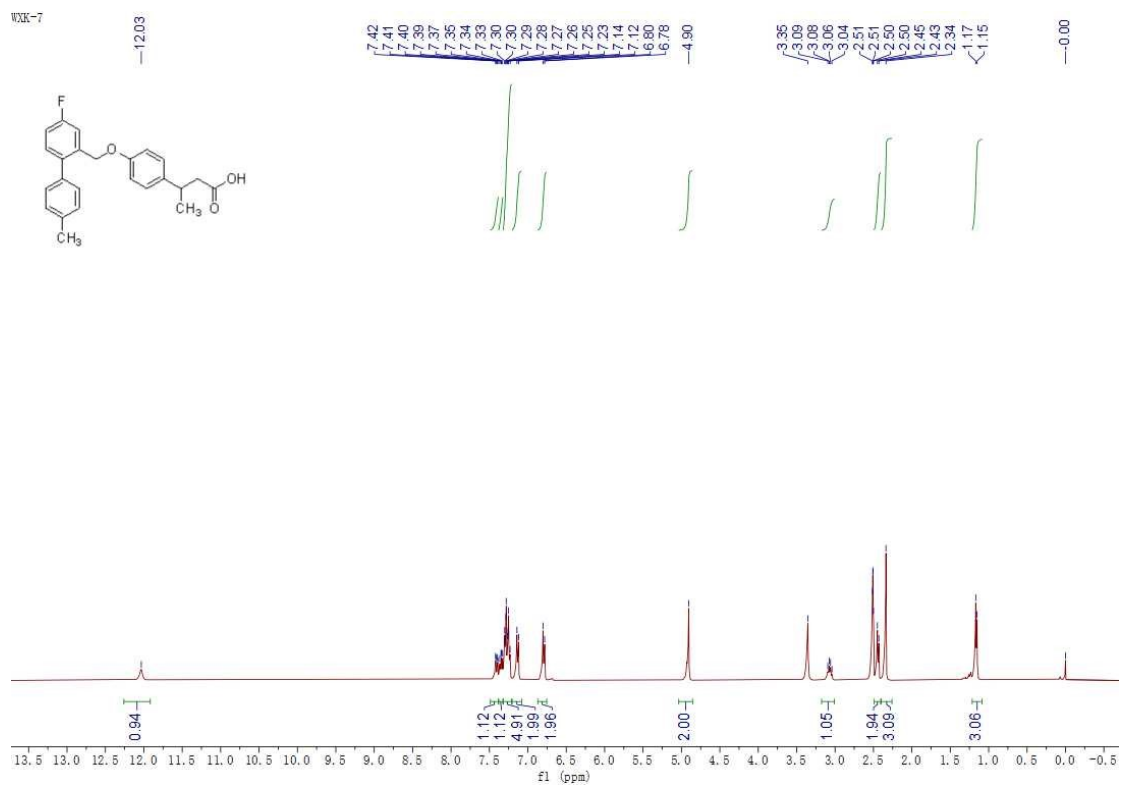

**Figure S4.**  $^1\text{H}$  NMR spectrum **2f**.

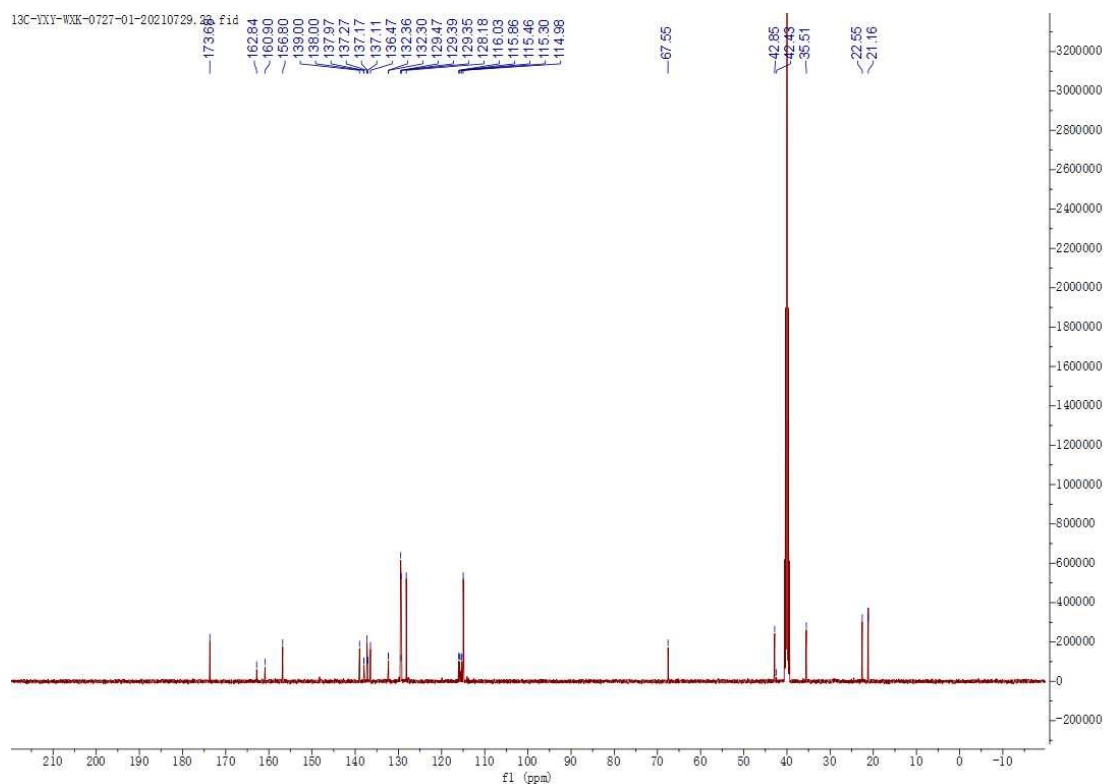

**Figure S5.**  $^{13}\text{C}$  NMR spectrum **2f**.

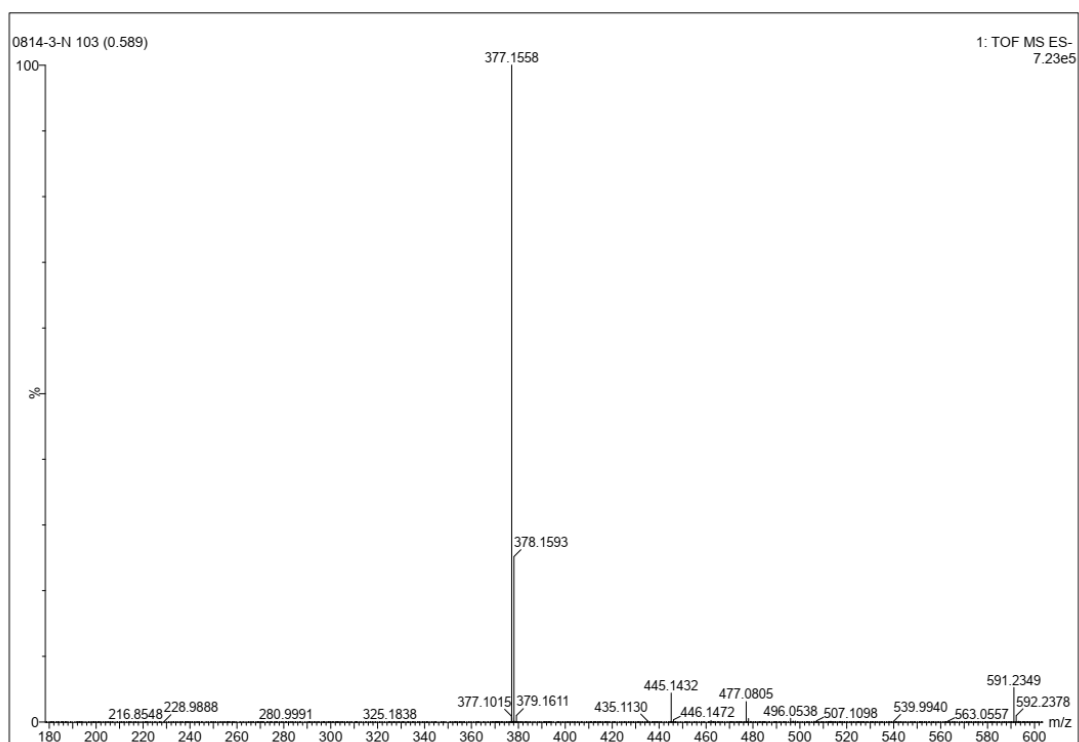

**Figure S6.** HRMS spectrum **2f**.

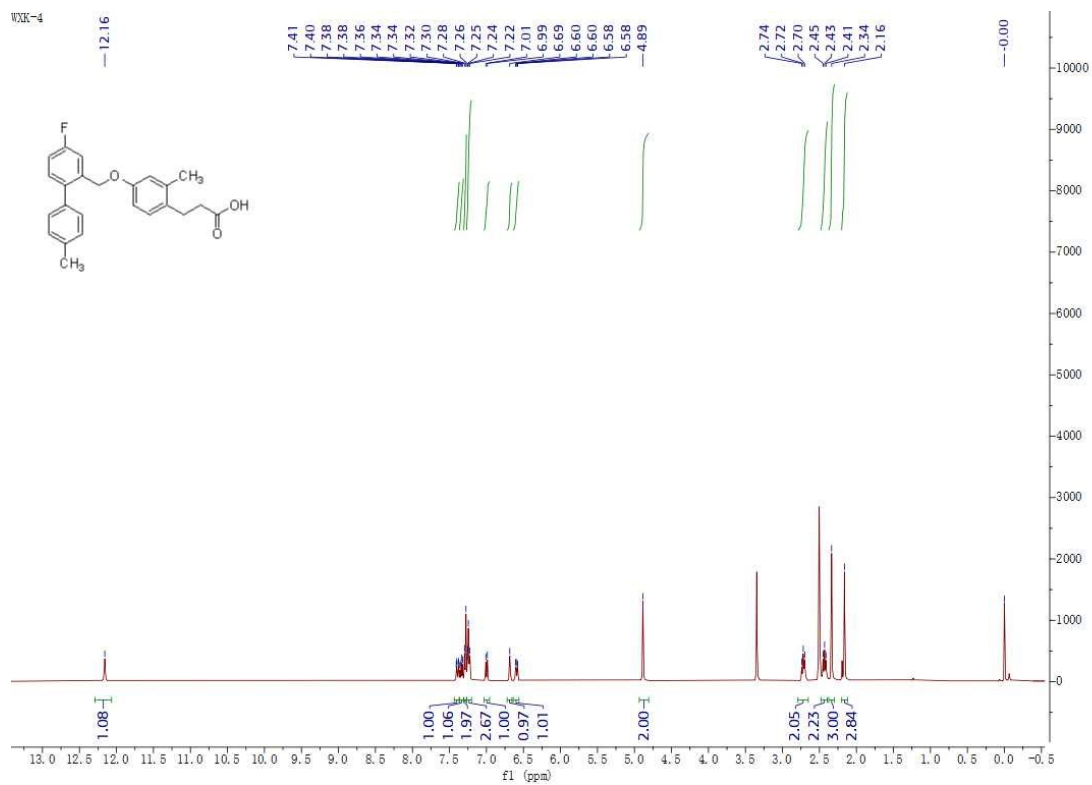

**Figure S7.**  $^1\text{H}$  NMR spectrum **3f**.

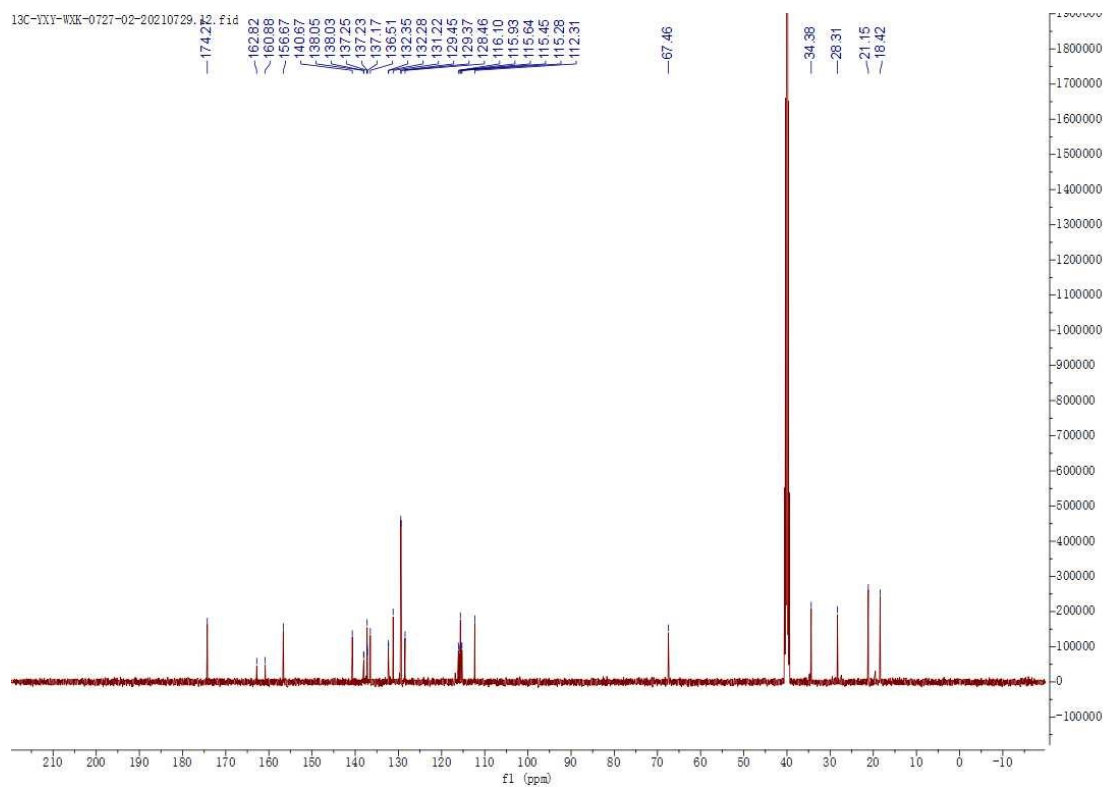

**Figure S8.**  $^{13}\text{C}$  NMR spectrum **3f**.

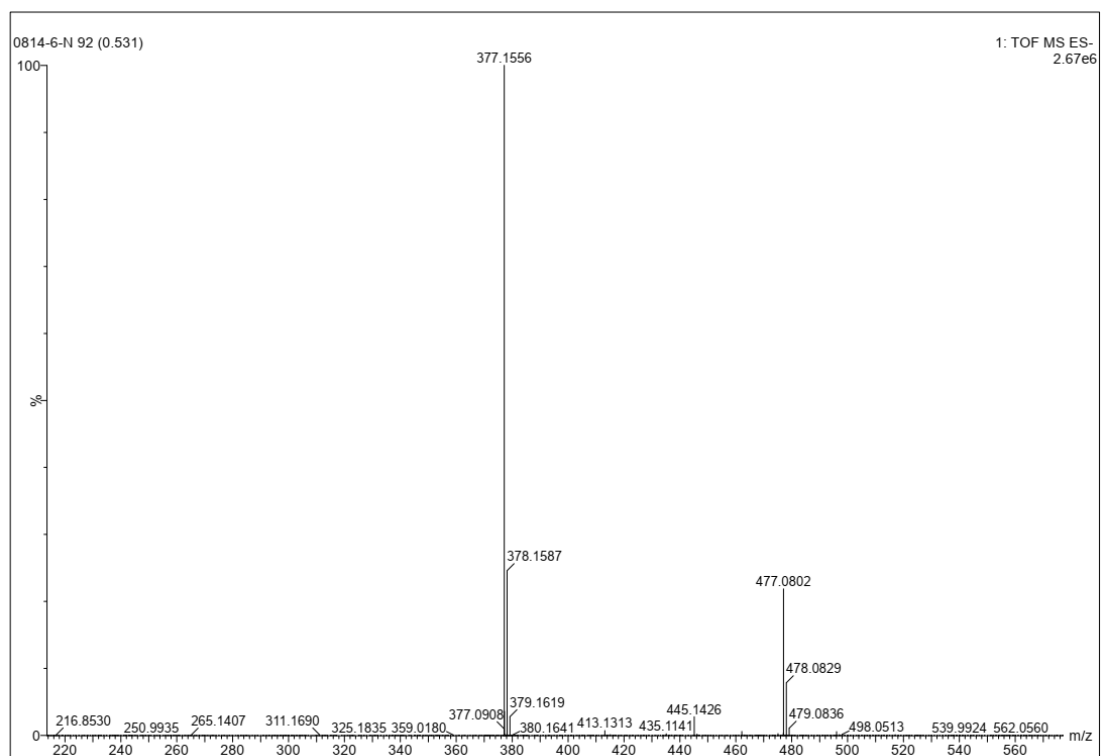

**Figure S9.** HRMS spectrum **3f**.

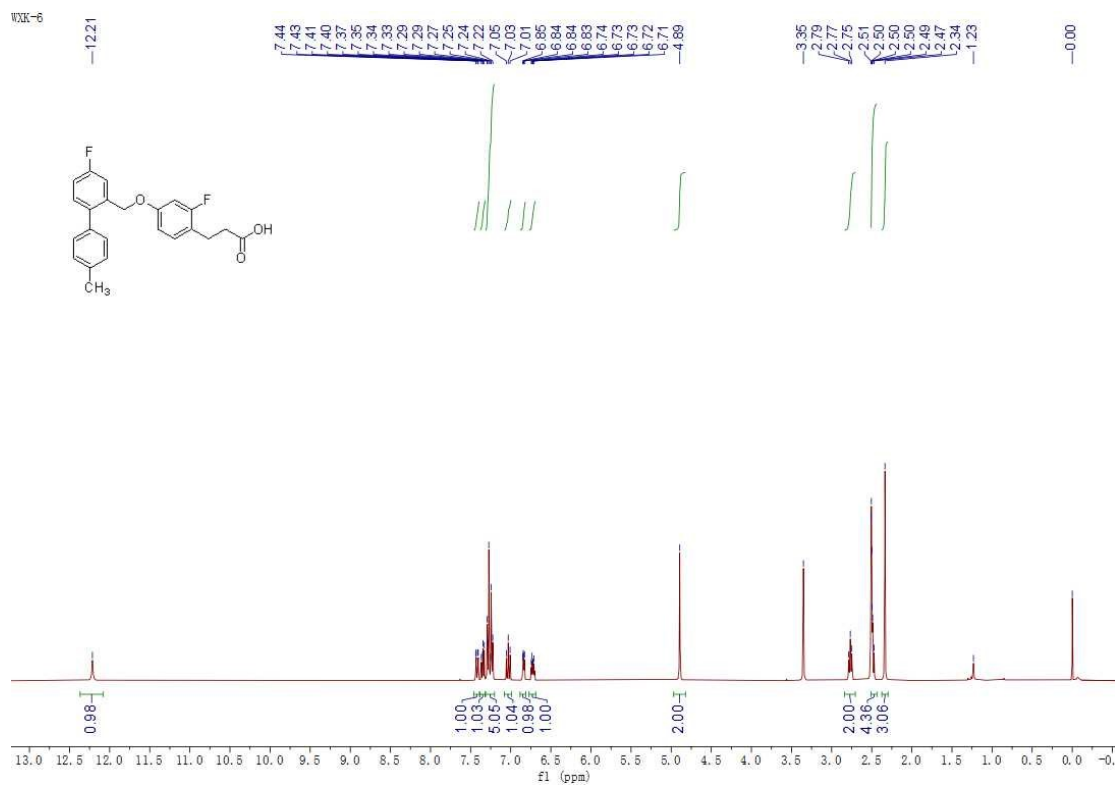

**Figure S10.**  $^1\text{H}$  NMR spectrum **4f**.

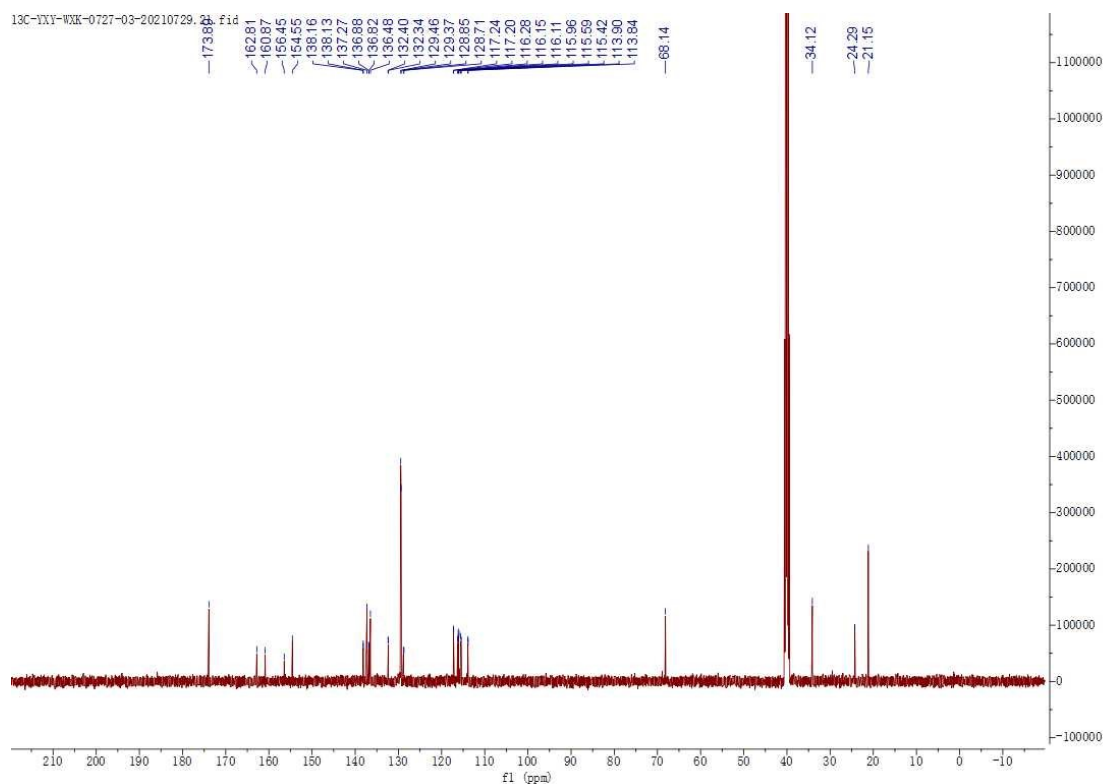

**Figure S11.**  $^{13}\text{C}$  NMR spectrum **4f**.

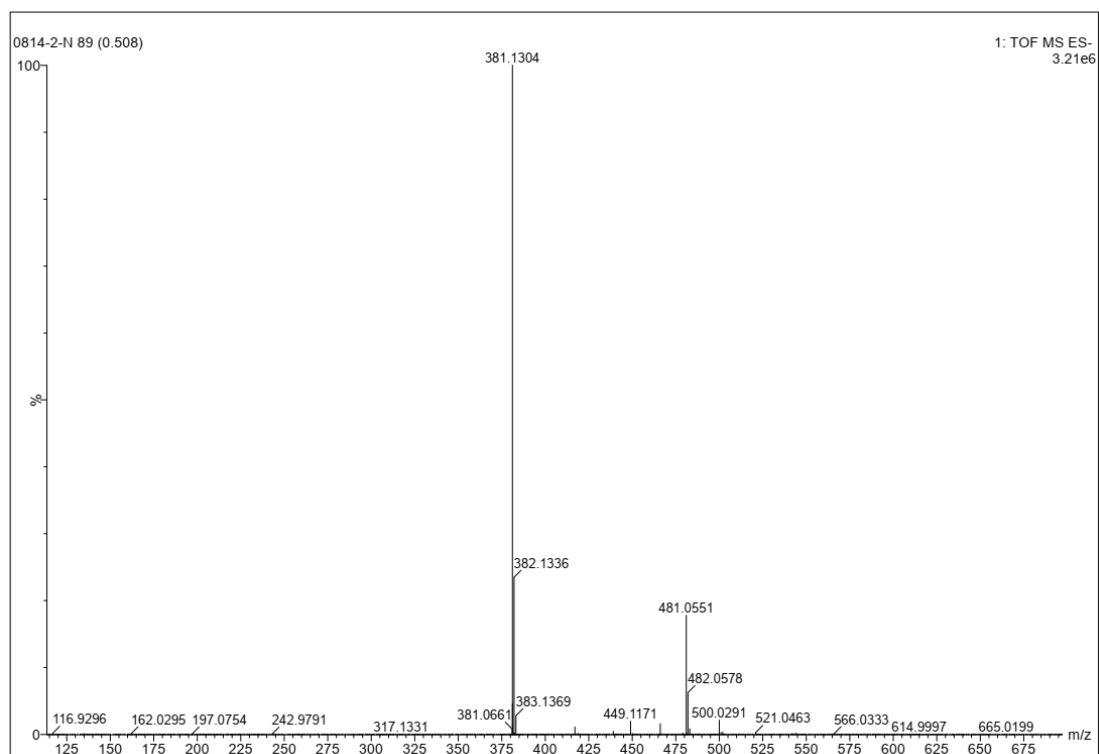

**Figure S12.** HRMS spectrum **4f**.

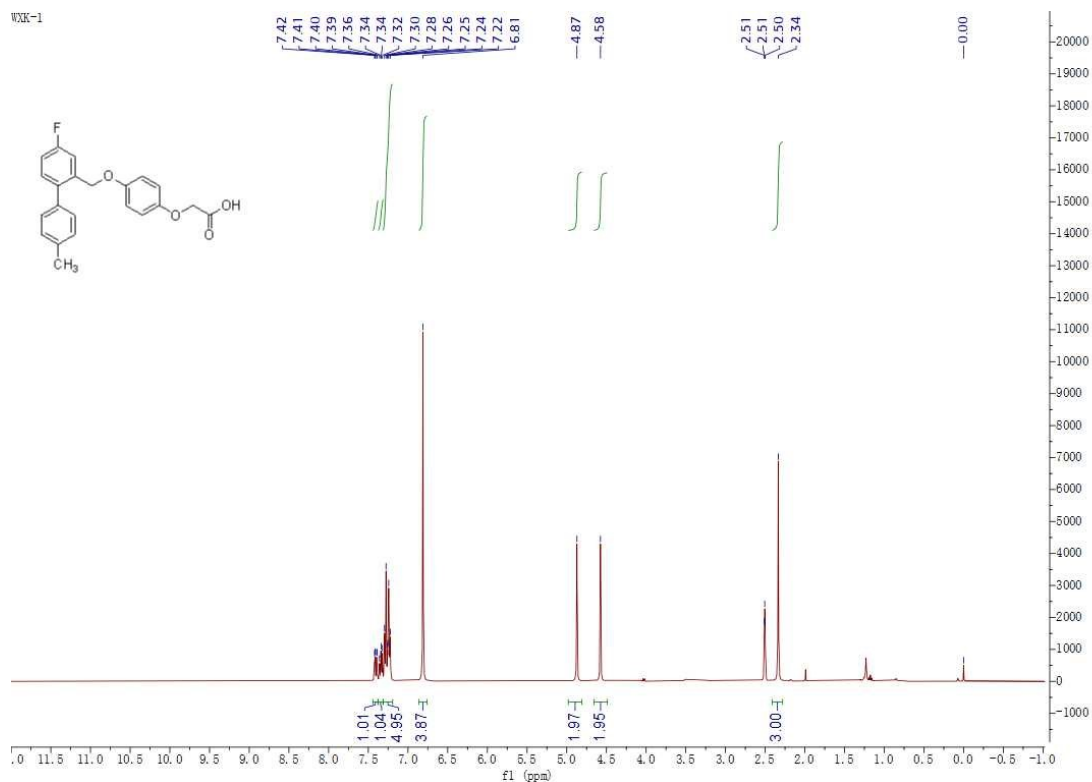

**Figure S13.** <sup>1</sup>H NMR spectrum **5f**.

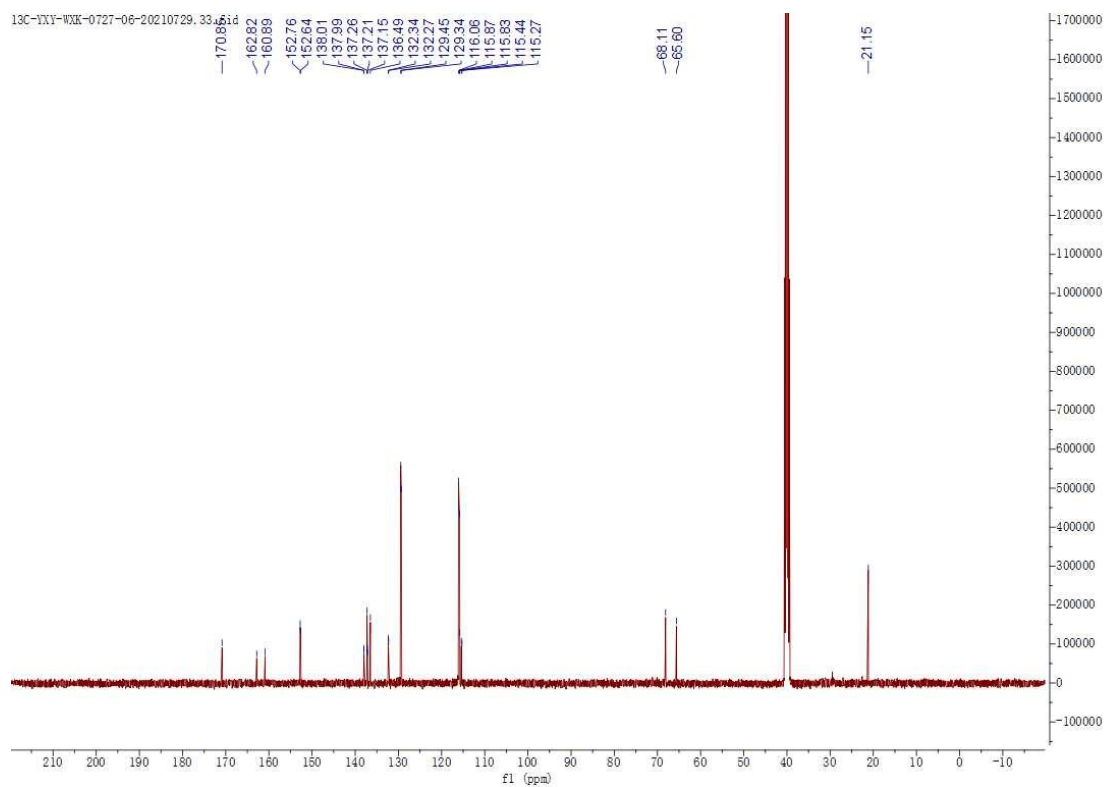

**Figure S14.** <sup>13</sup>C NMR spectrum **5f**.



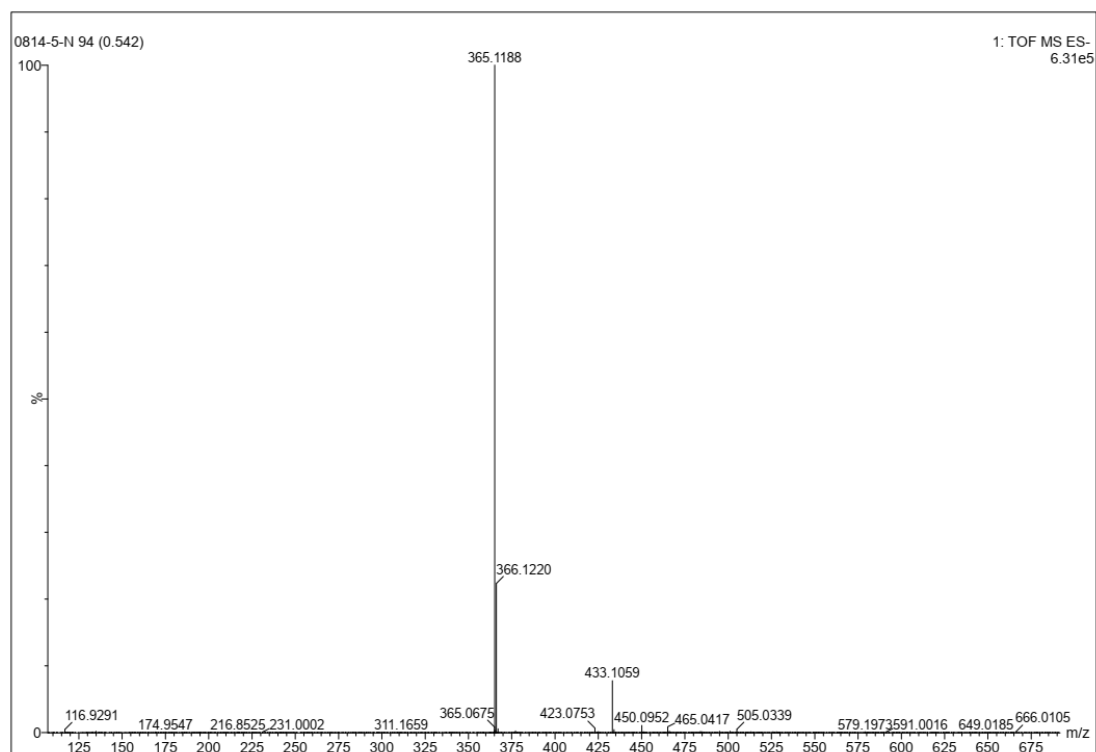

**Figure S15.** HRMS spectrum **5f**.

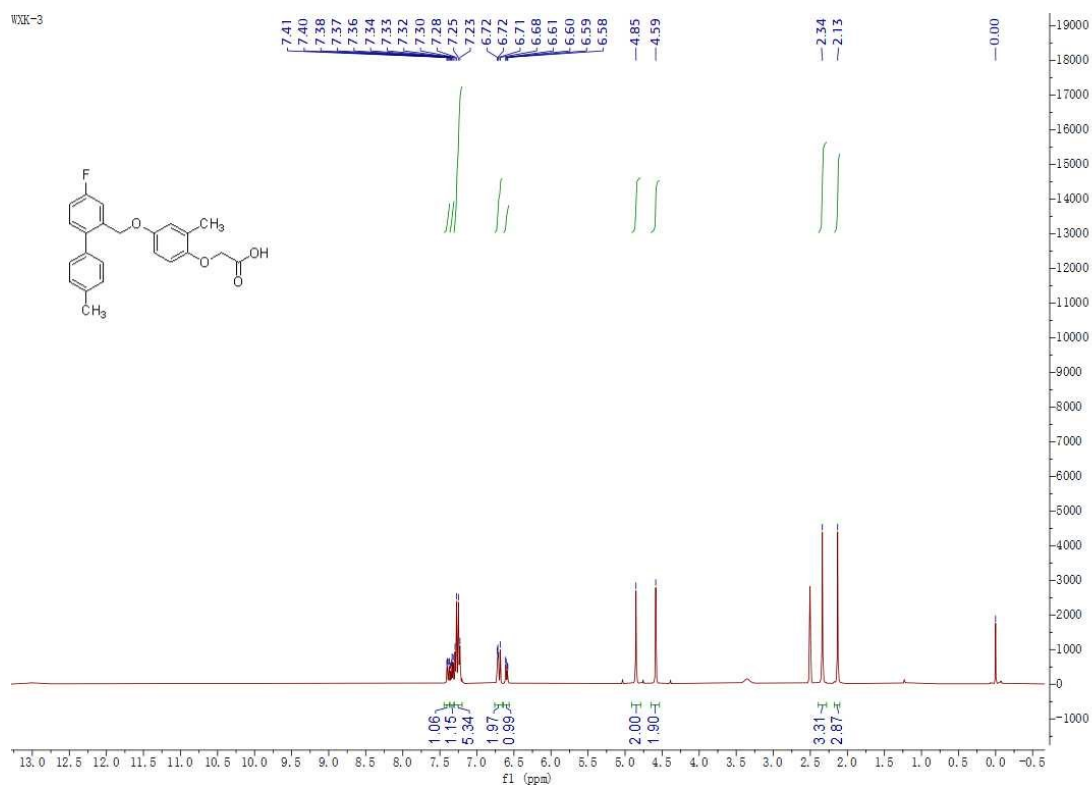

**Figure S16.** <sup>1</sup>H NMR spectrum **6f**.

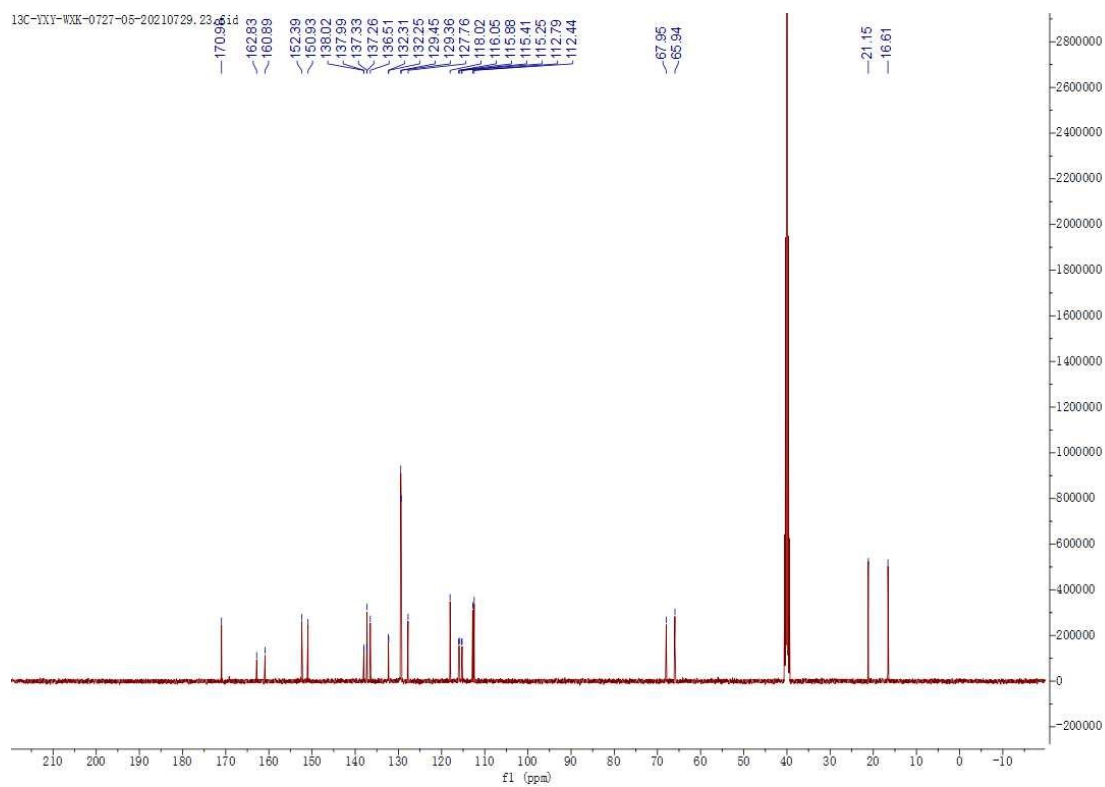

**Figure S17.**  $^{13}\text{C}$  NMR spectrum **6f**.

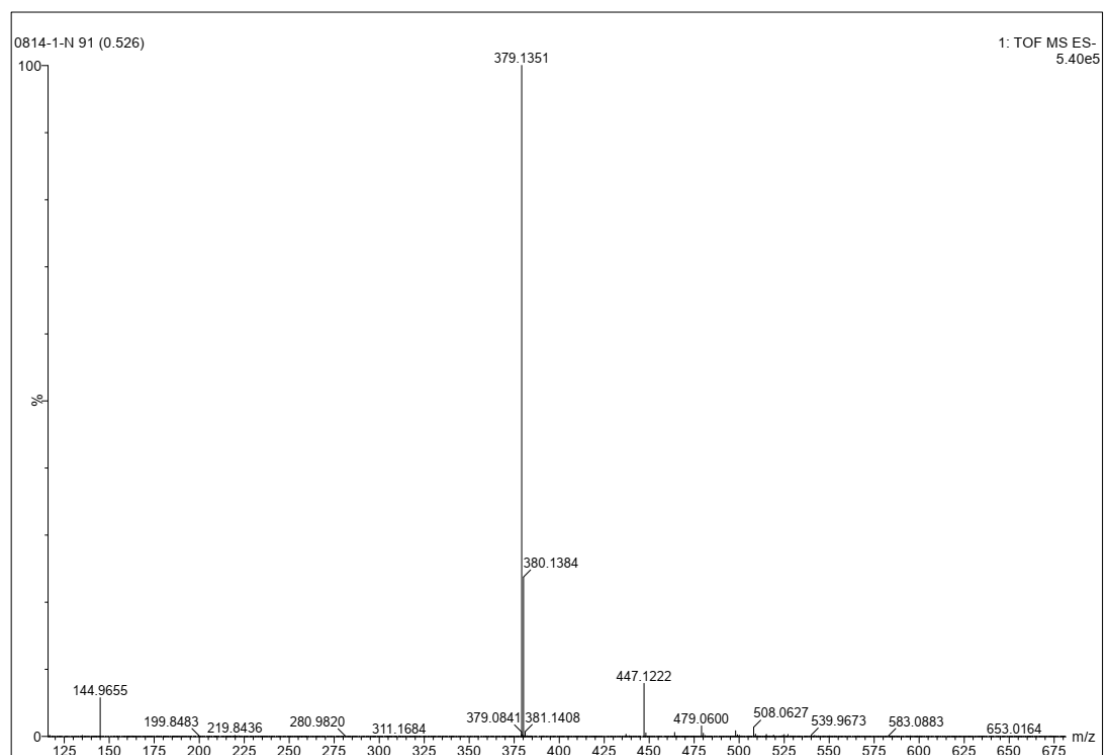

**Figure S18.** HRMS spectrum **6f**.

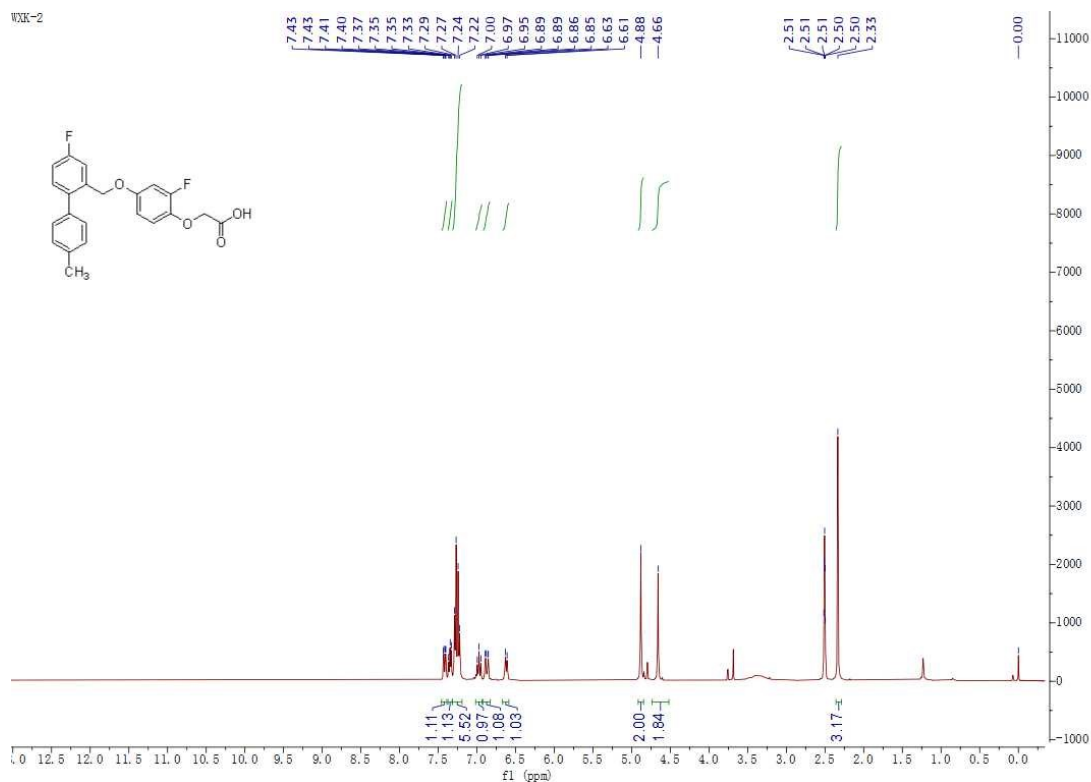

**Figure S19.** <sup>1</sup>H NMR spectrum **7f**.

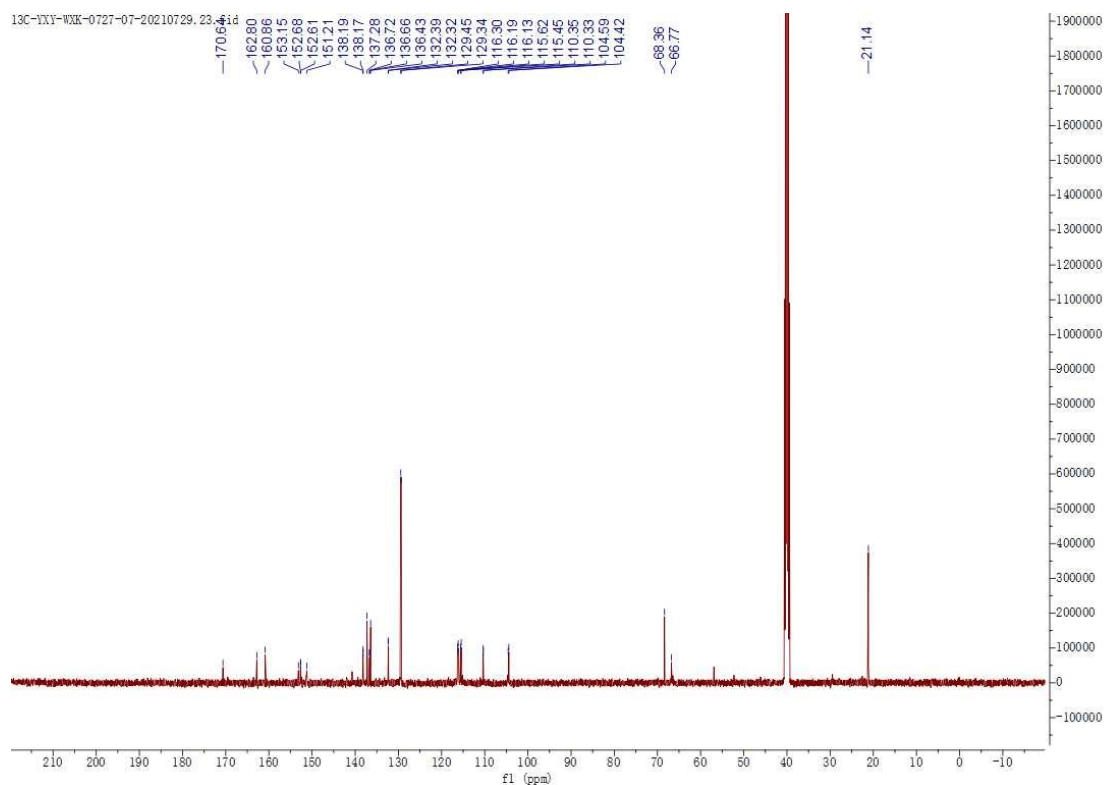

**Figure S20.** <sup>13</sup>C NMR spectrum **7f**.

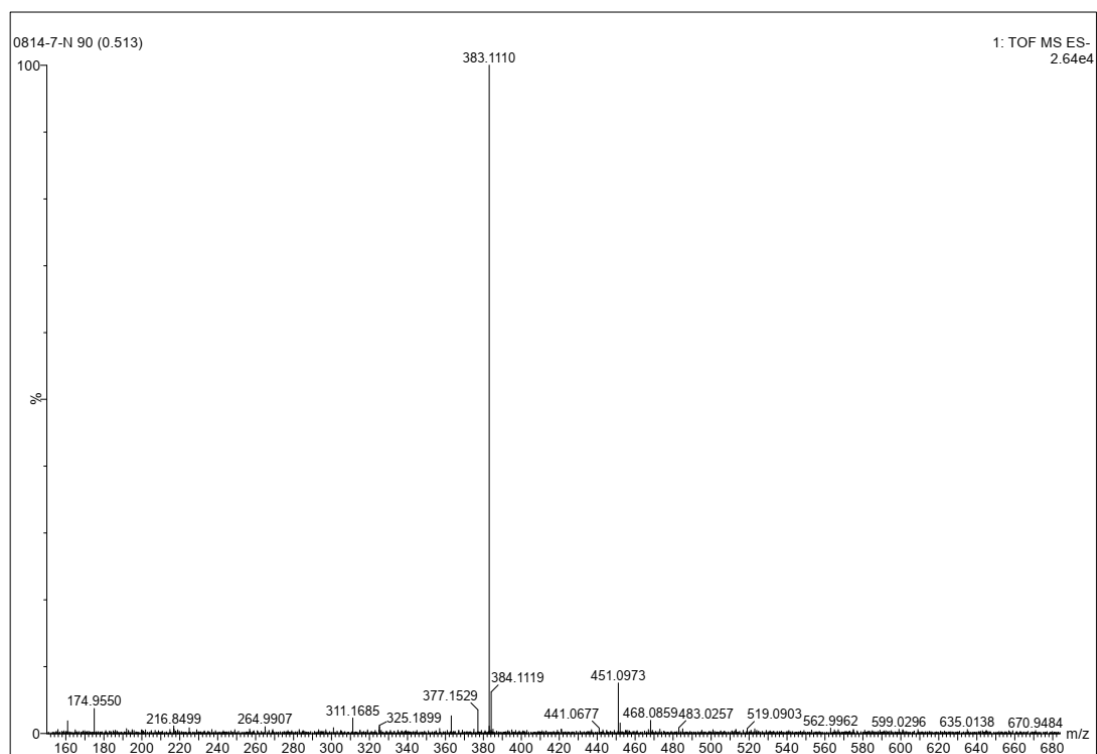

**Figure S21.** HRMS spectrum **7f**.

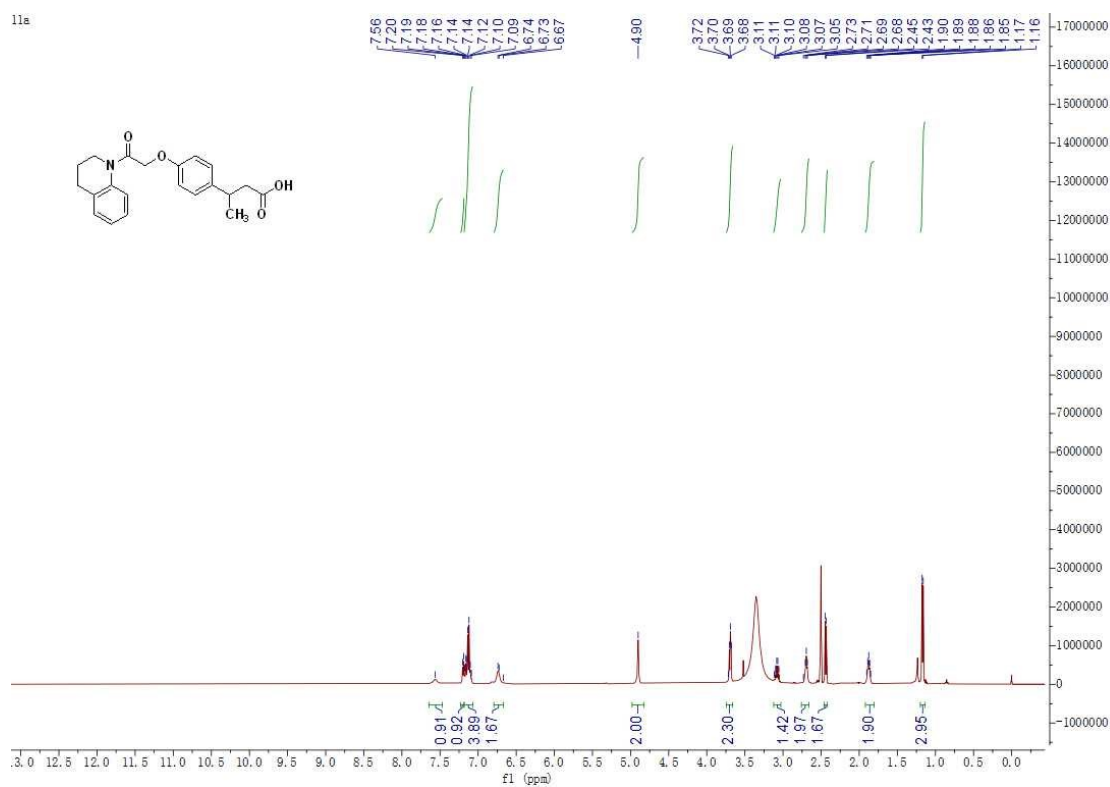

**Figure S22.**  $^1\text{H}$  NMR spectrum **11a**.

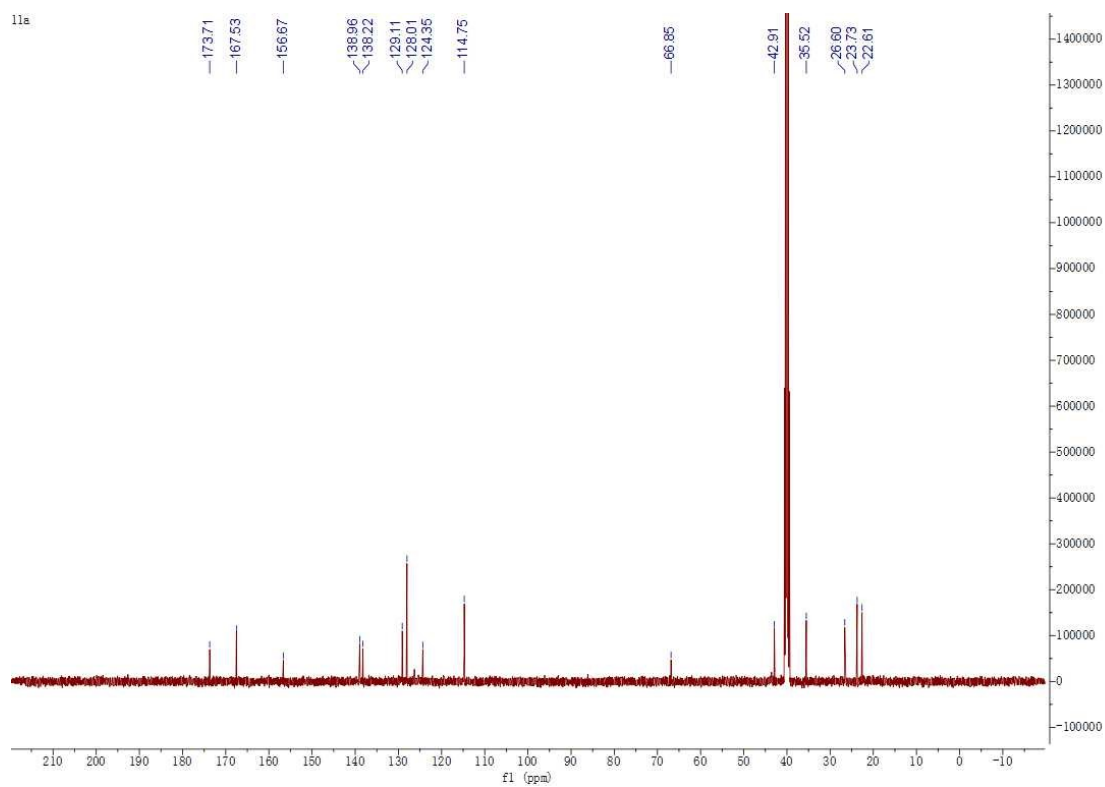

**Figure S23.**  $^{13}\text{C}$  NMR spectrum **11a**.

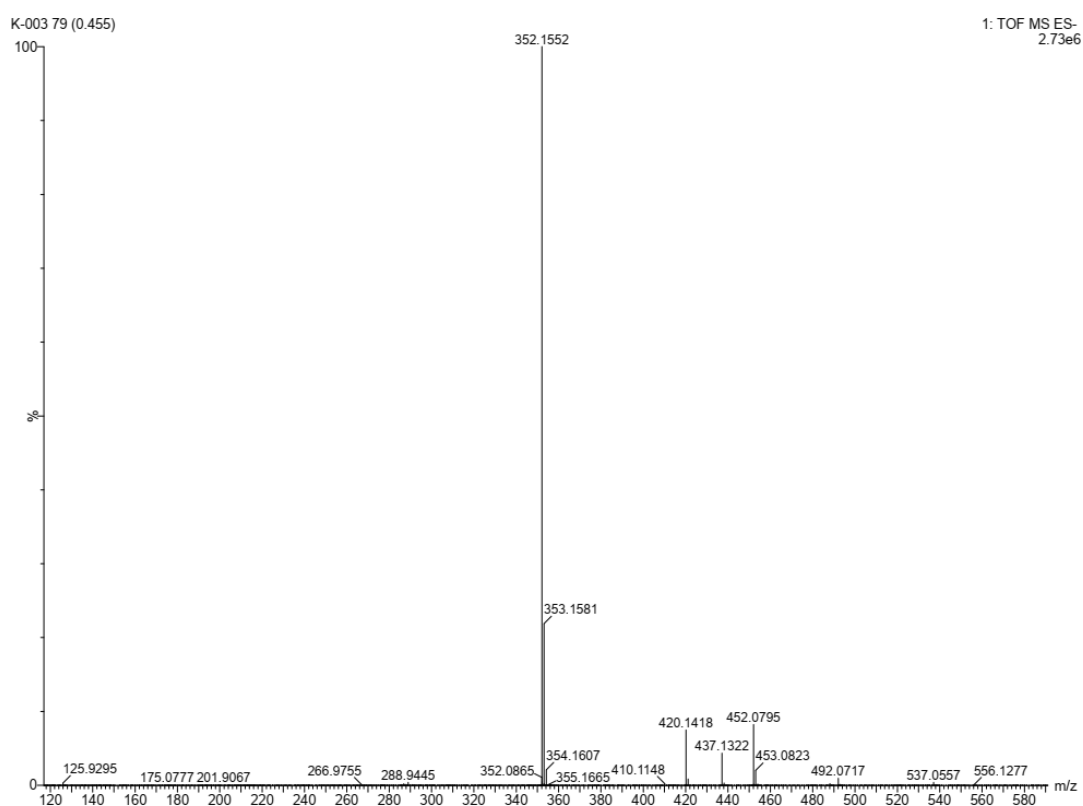

**Figure S24.** HRMS spectrum **11a**.

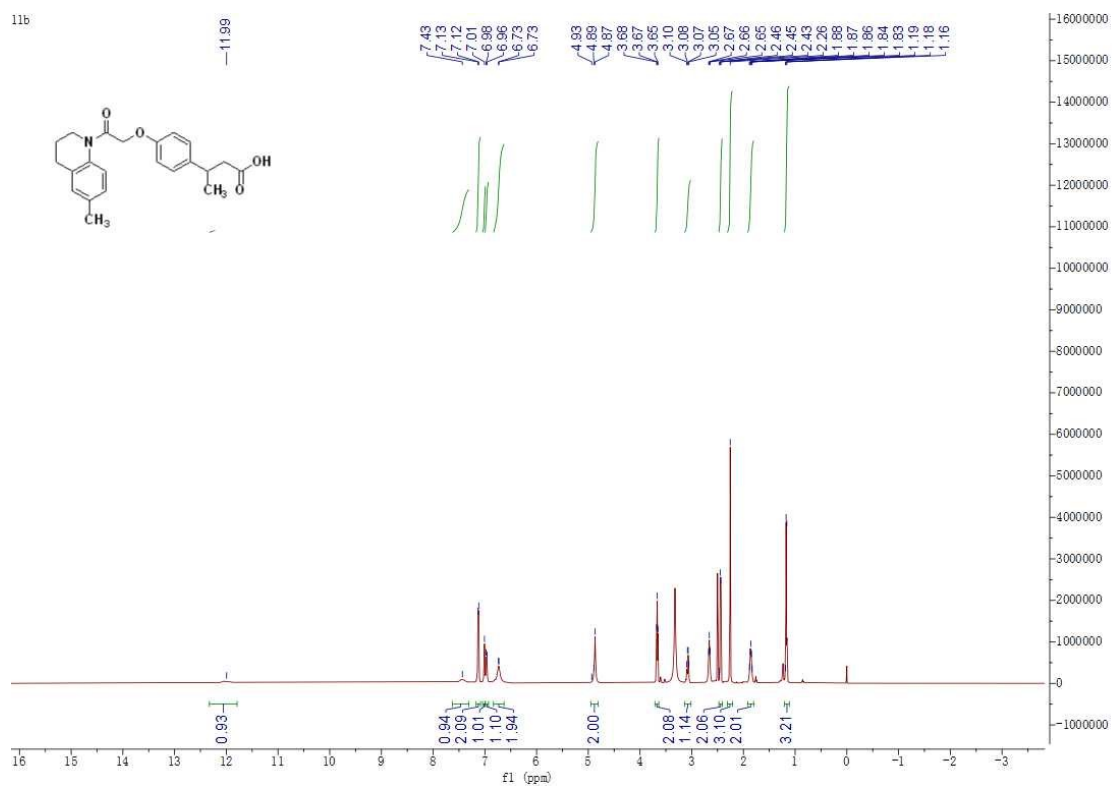

**Figure S25.** <sup>1</sup>H NMR spectrum **11b**.

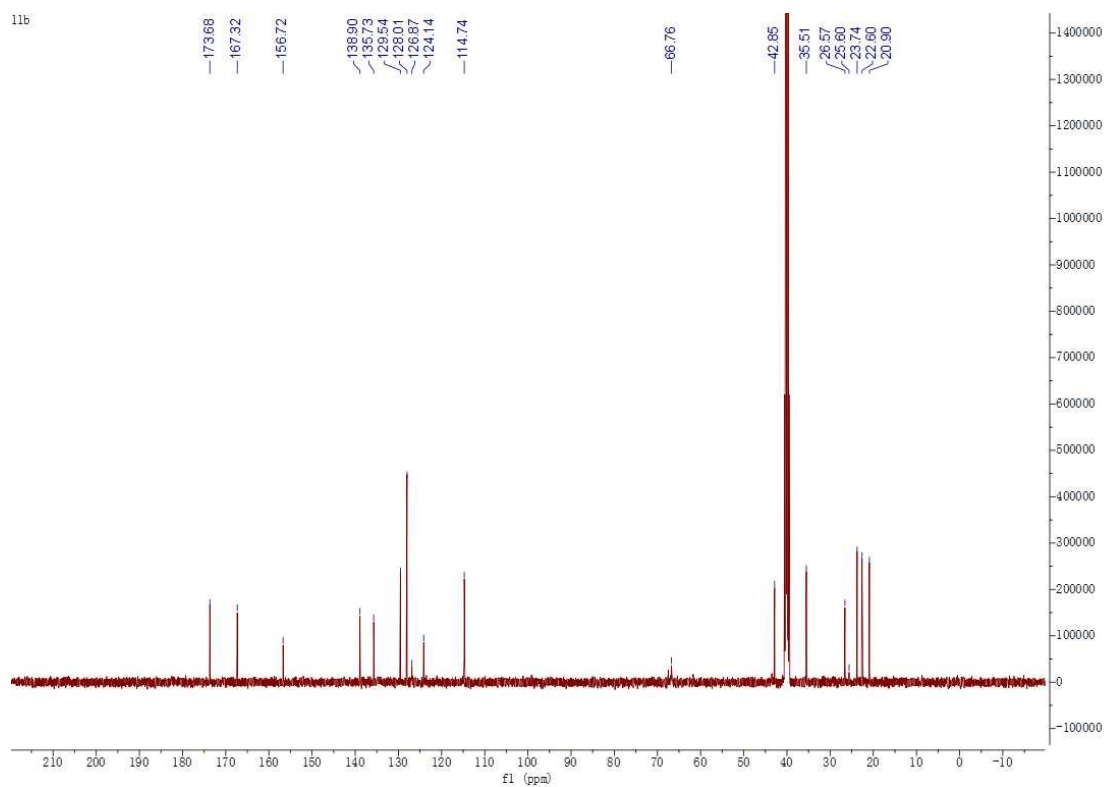

**Figure S26.** <sup>13</sup>C NMR spectrum **11b**.

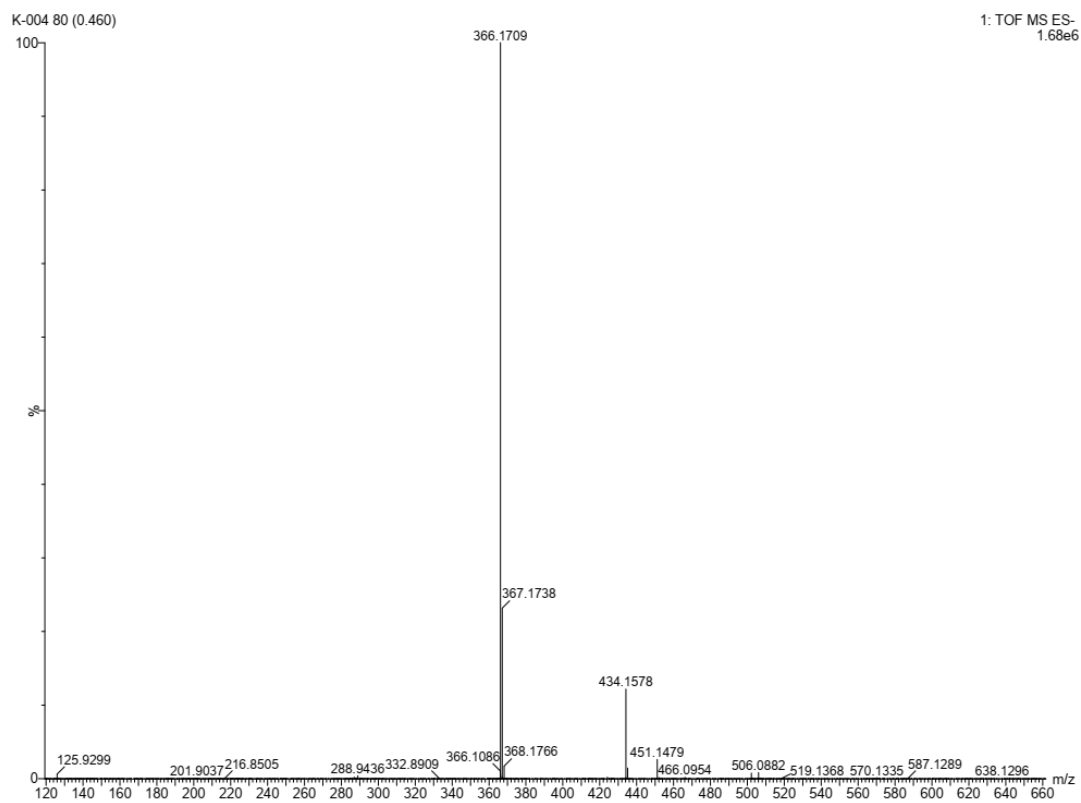

**Figure S27.** HRMS spectrum **11b**.

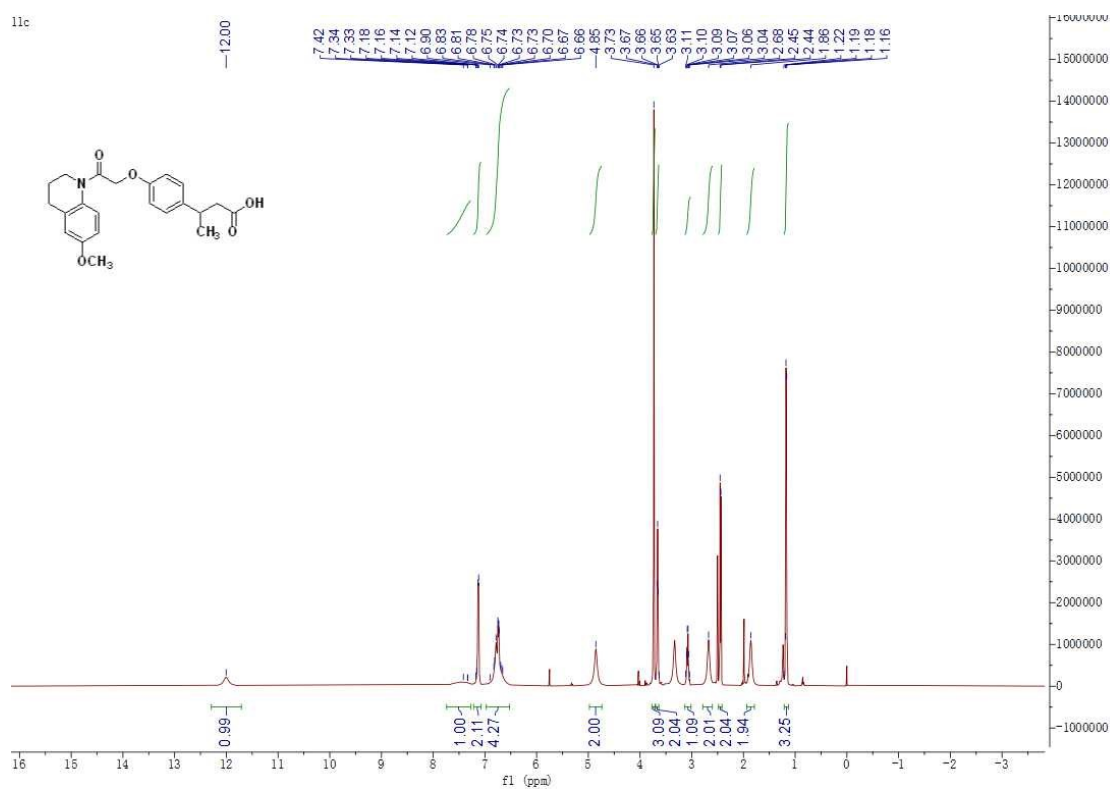

**Figure S28.**  $^1\text{H}$  NMR spectrum **11c**.

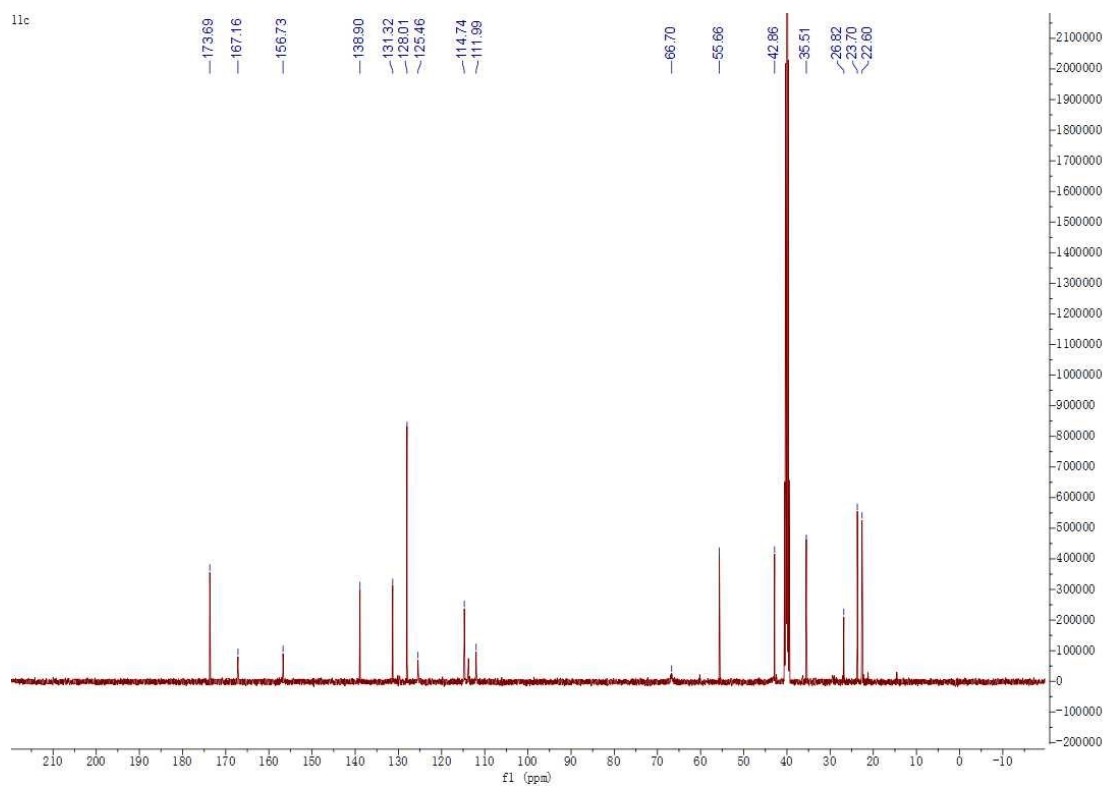

Figure S29.  $^{13}\text{C}$  NMR spectrum **11c**.

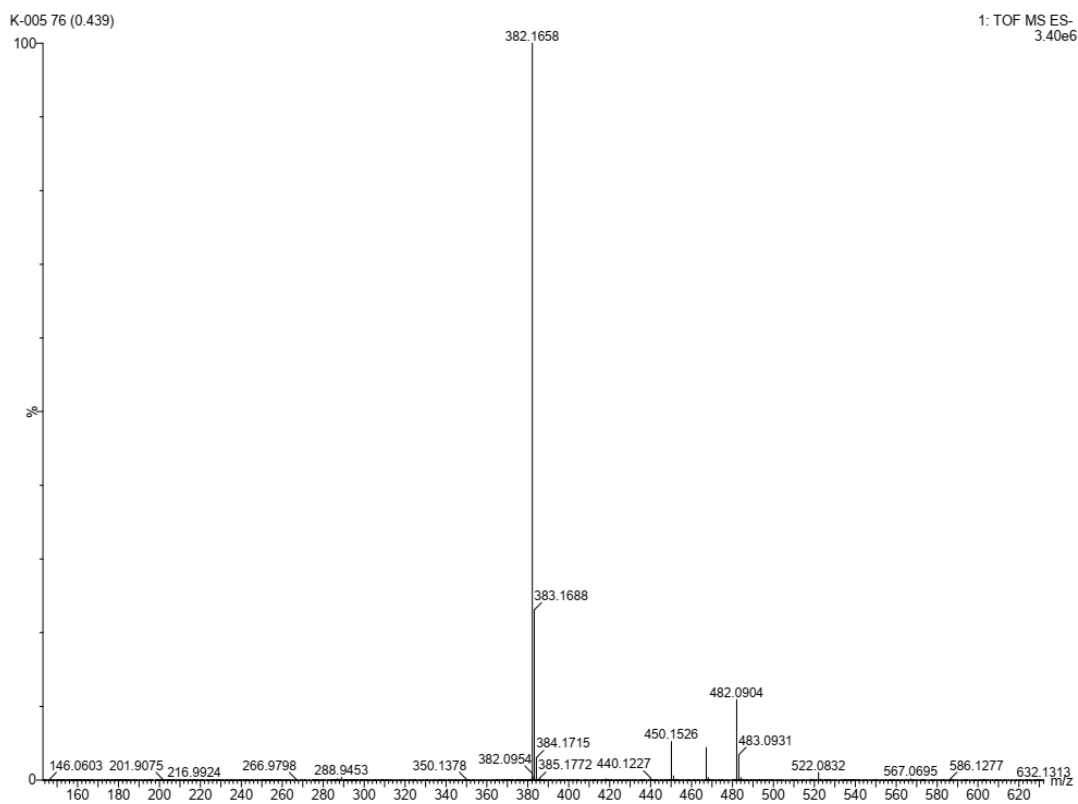

Figure S30. HRMS spectrum **11c**.



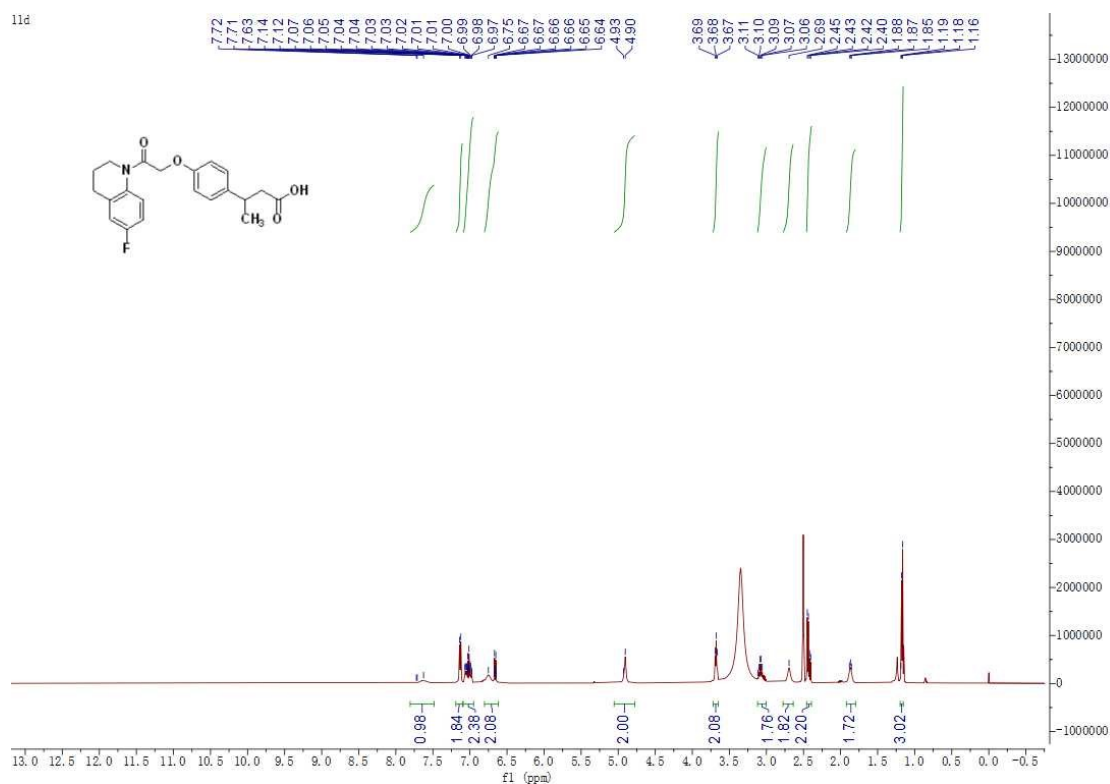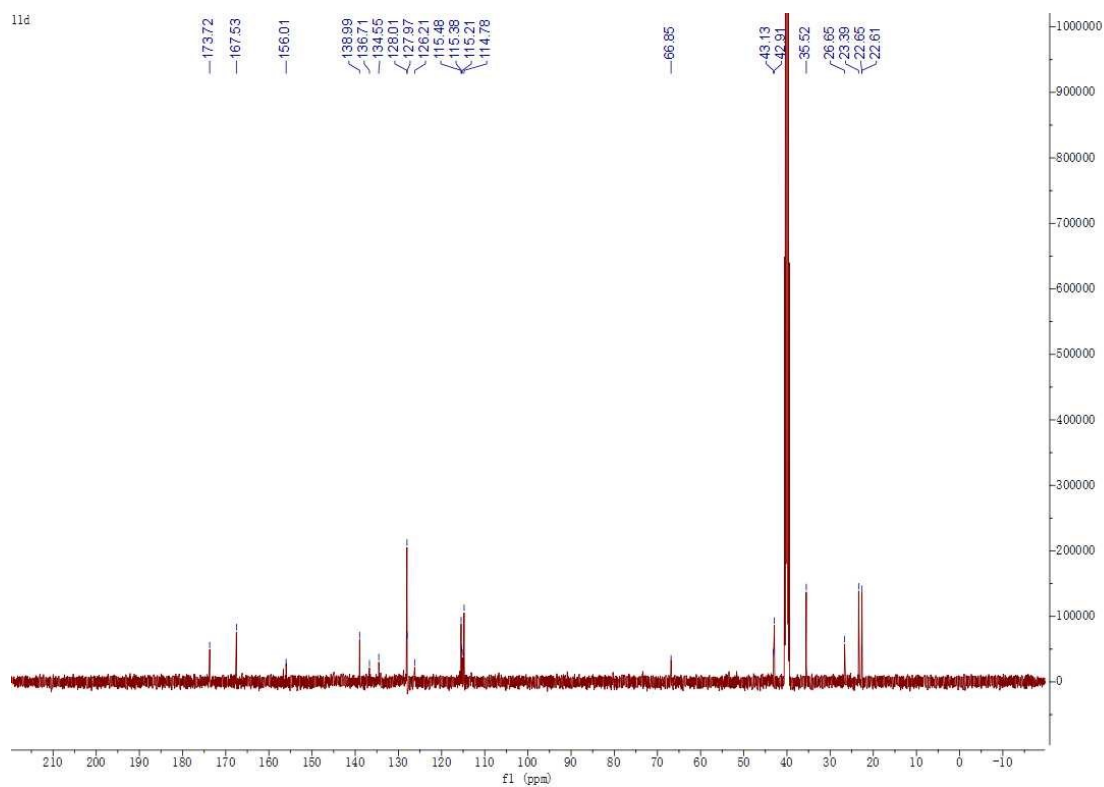

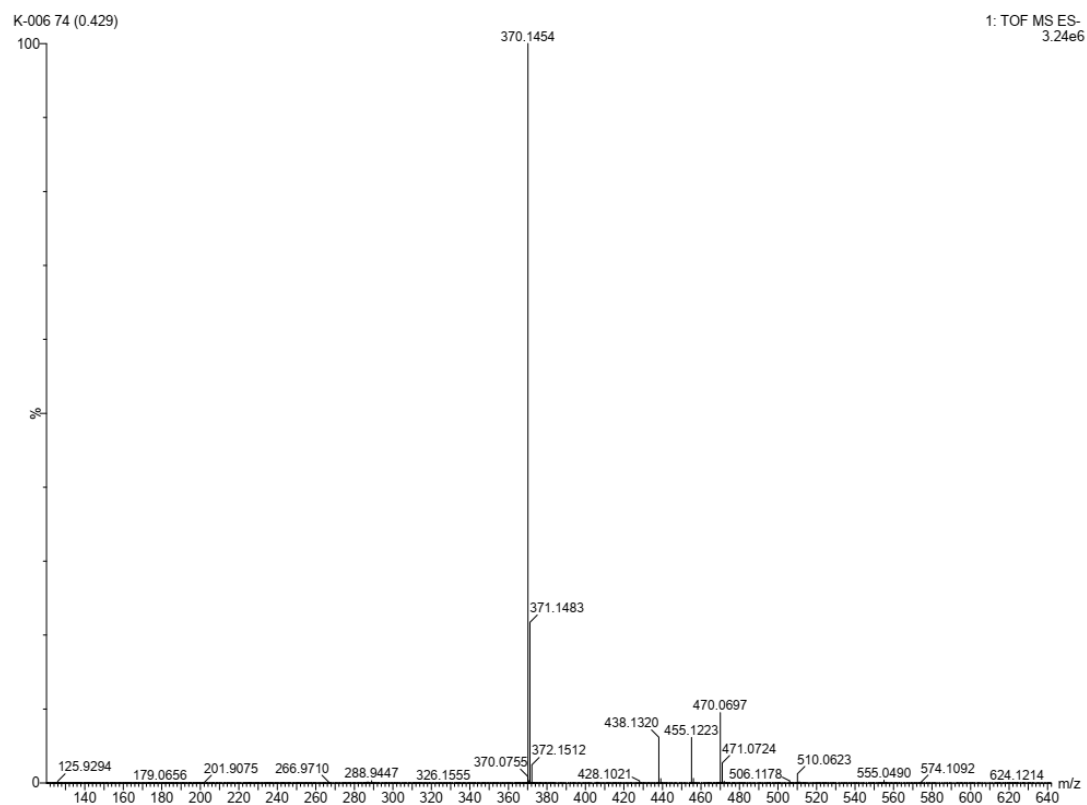

**Figure S33.** HRMS spectrum **11d**.

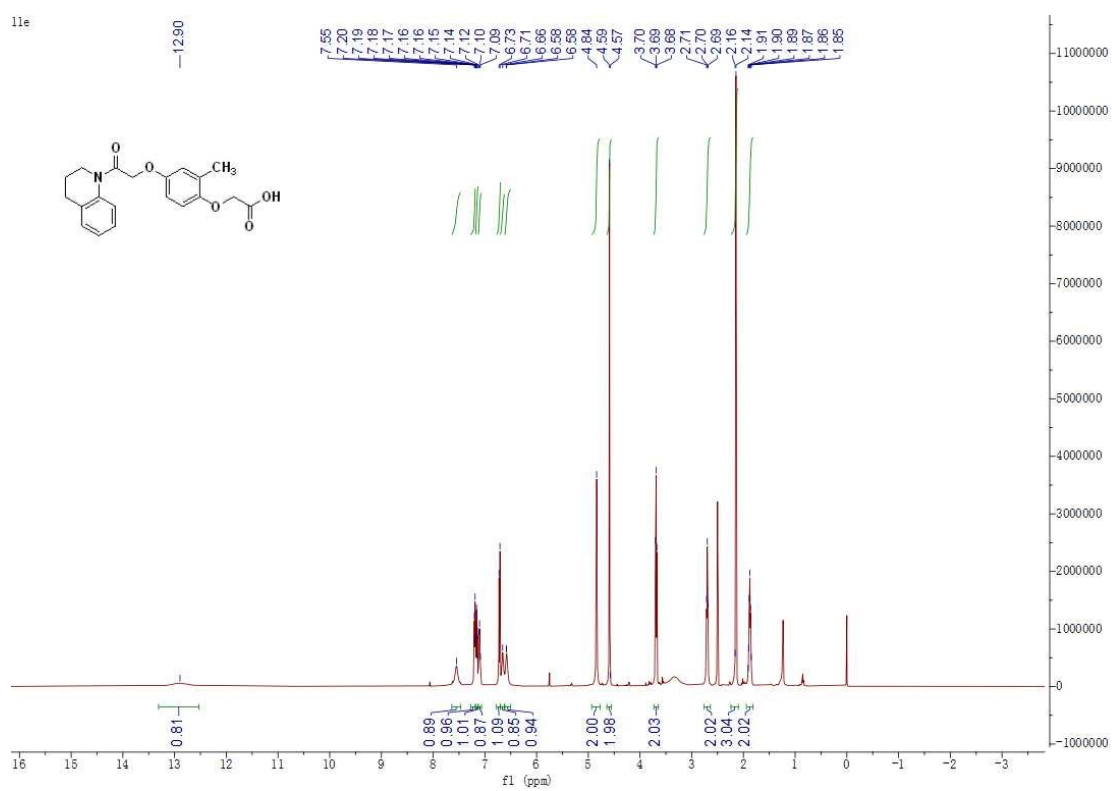

**Figure S34.**  $^1\text{H}$  NMR spectrum **11e**.

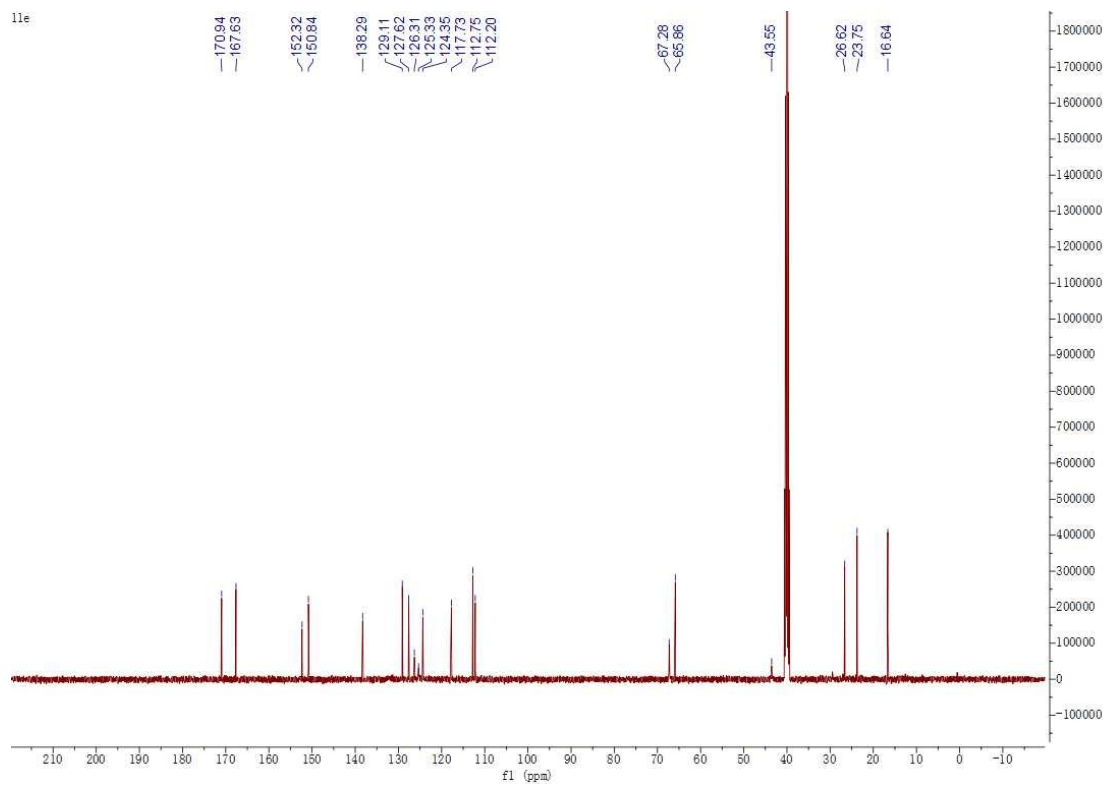

**Figure S35.**  $^{13}\text{C}$  NMR spectrum **11e**.

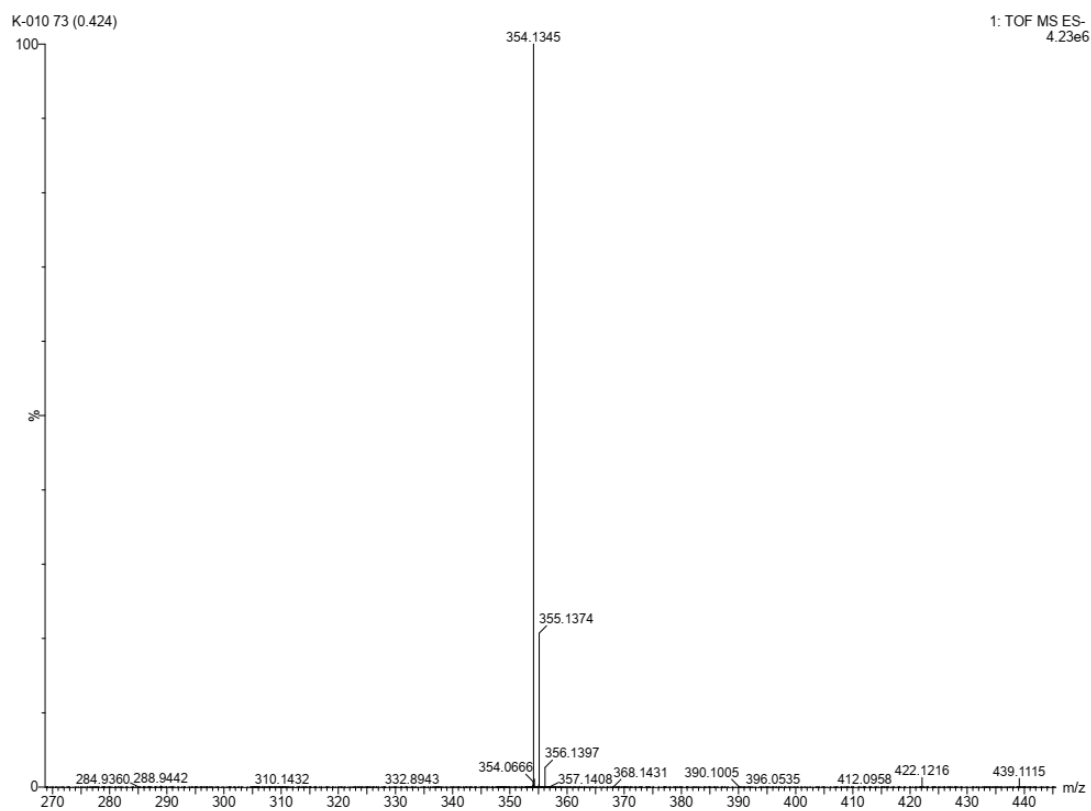

**Figure S36.** HRMS spectrum **11e**.

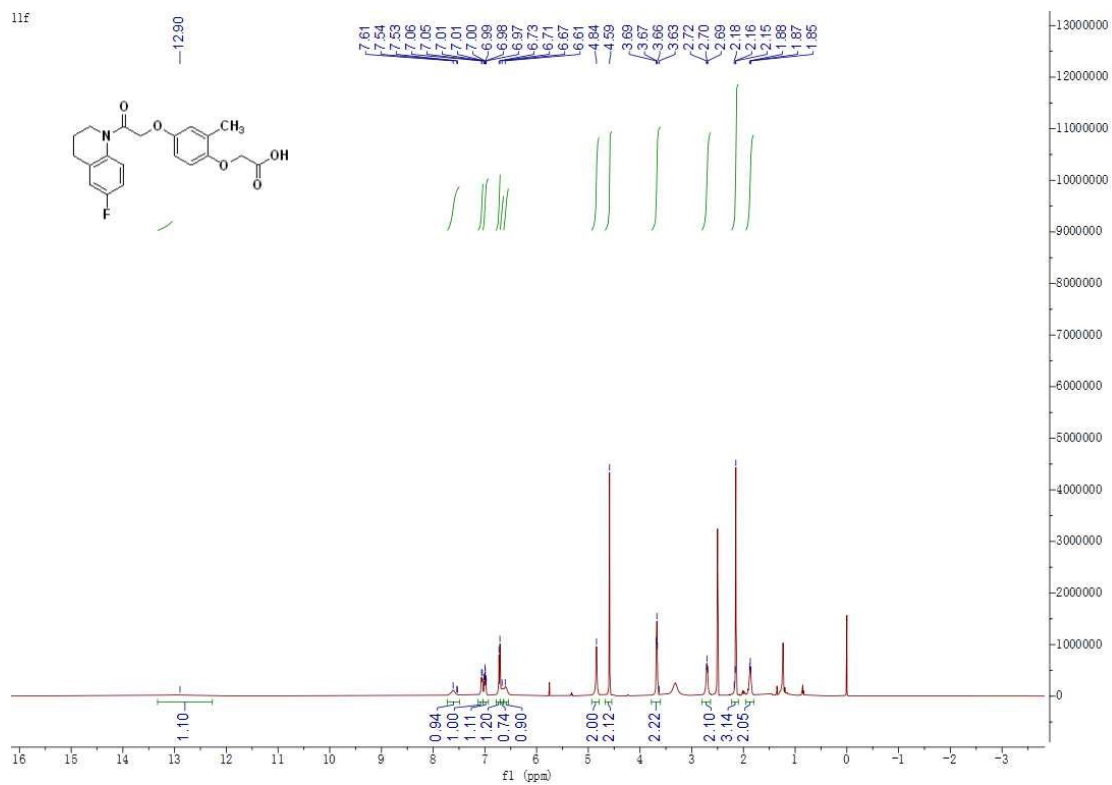

**Figure S37.** <sup>1</sup>H NMR spectrum 11f.

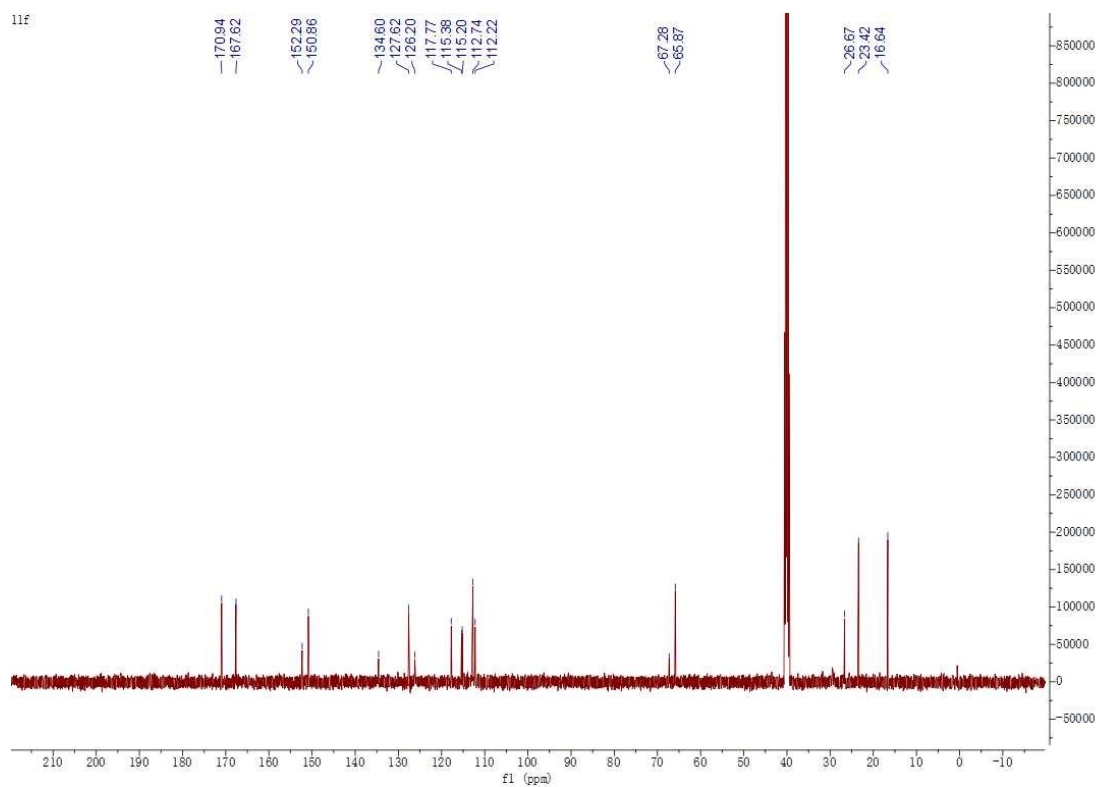

**Figure S38.** <sup>13</sup>C NMR spectrum 11f.

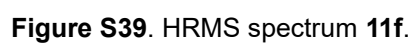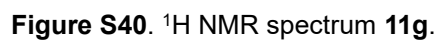

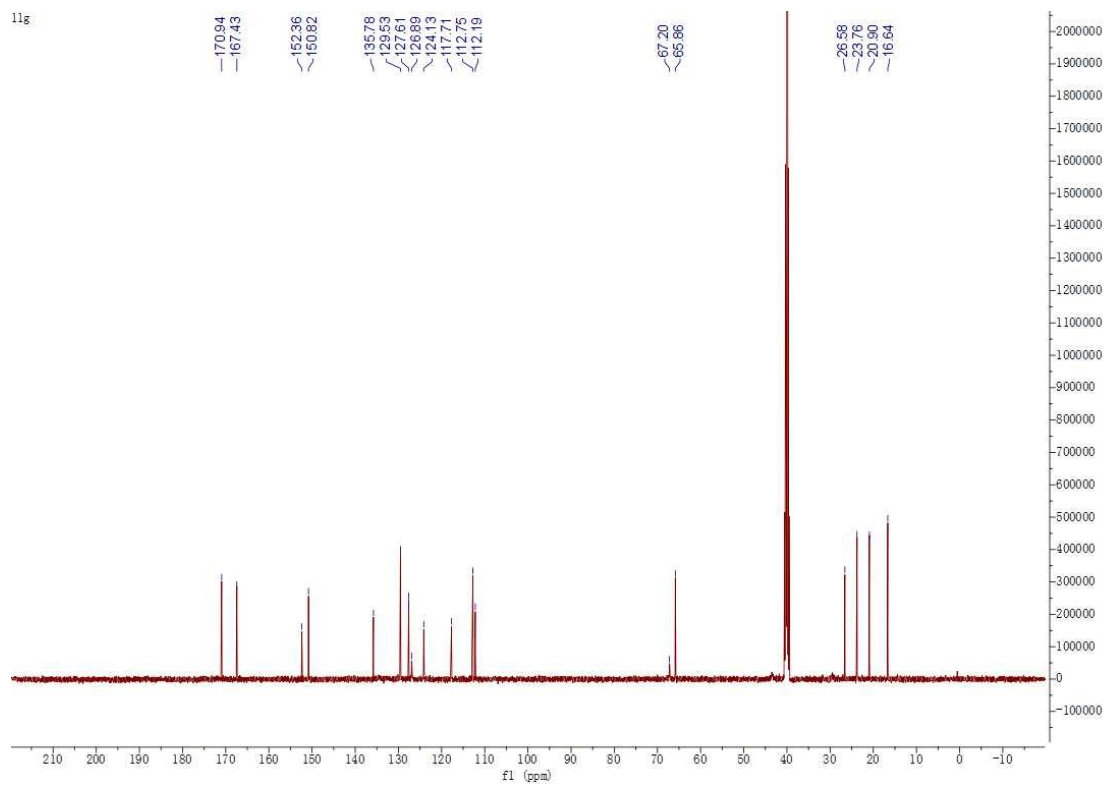

**Figure S41.**  $^{13}\text{C}$  NMR spectrum **11g**.

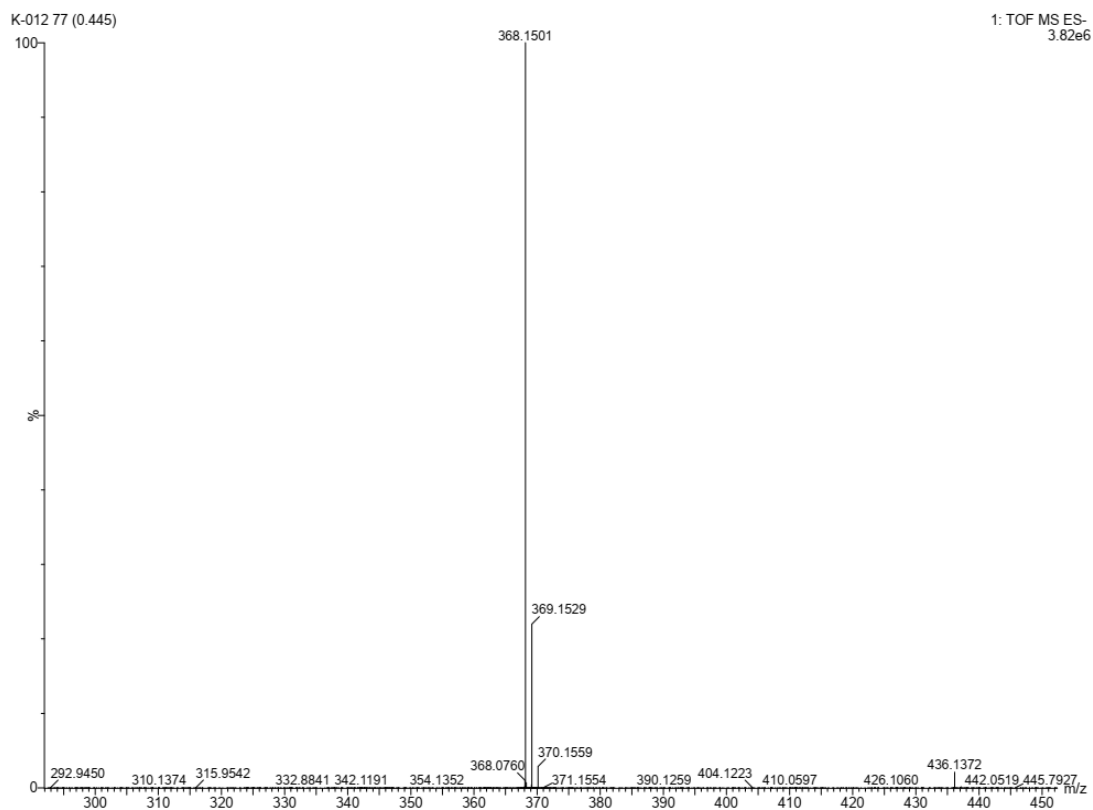

**Figure S42.** HRMS spectrum **11g**.

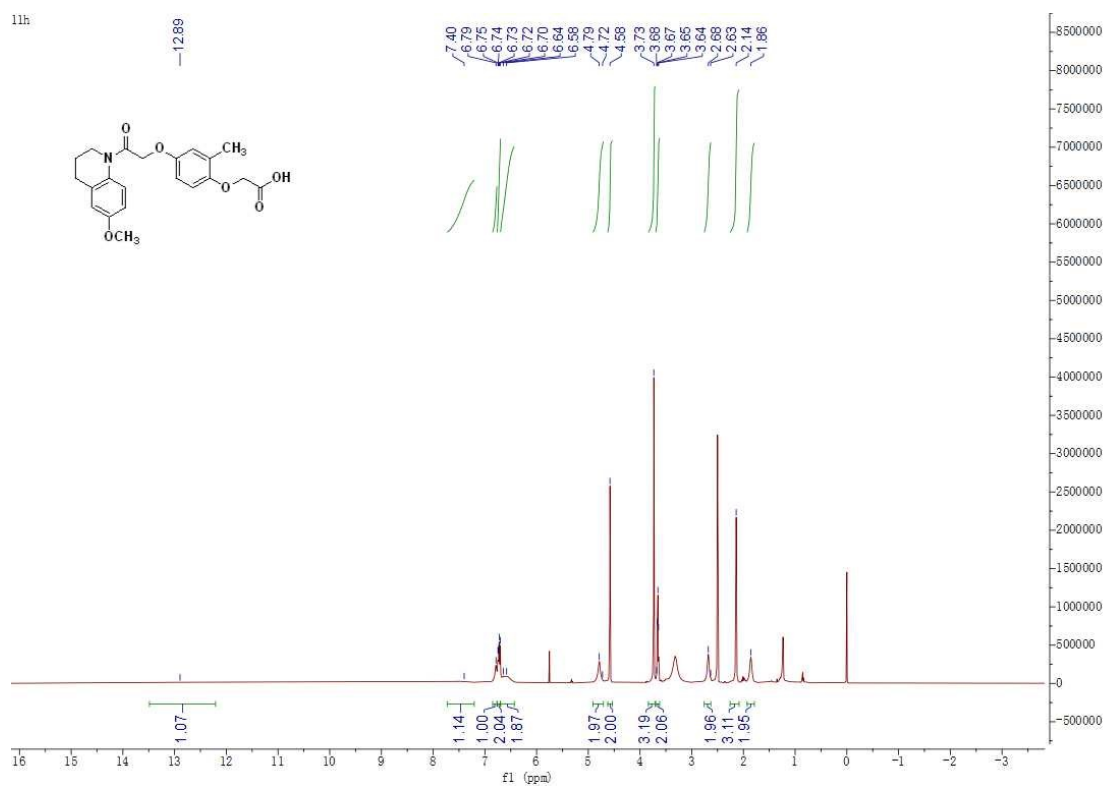

**Figure S43.** <sup>1</sup>H NMR spectrum 11h.

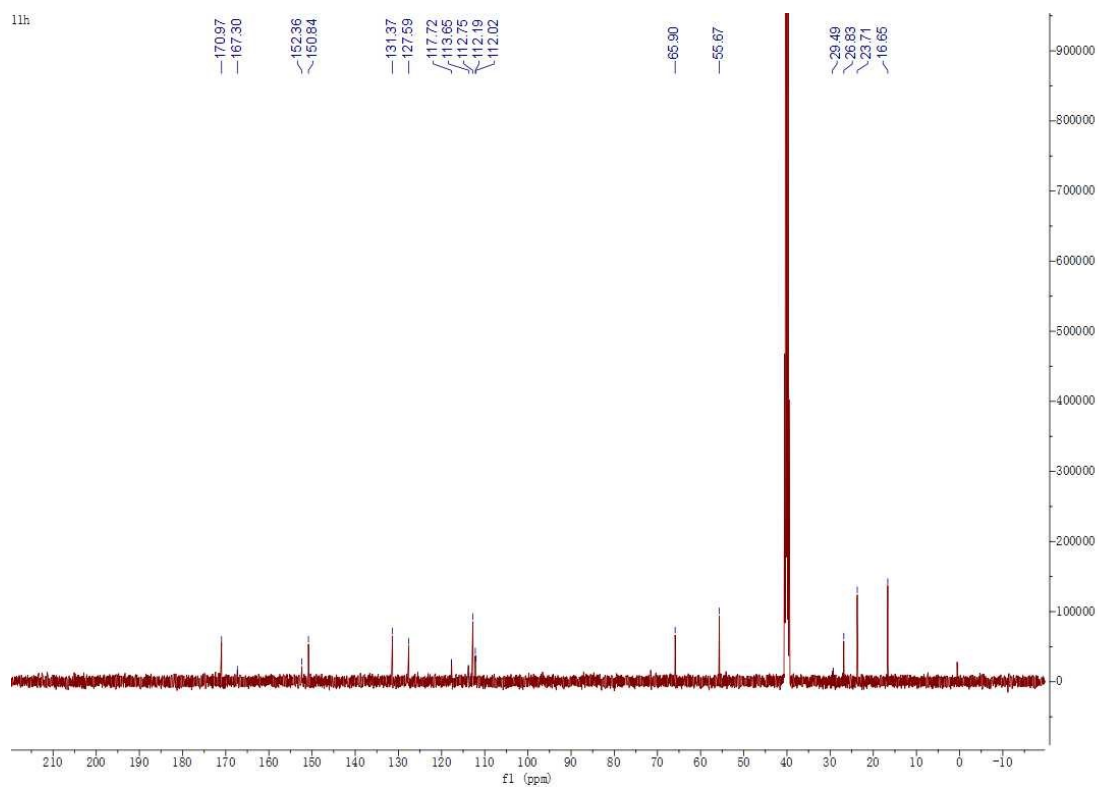

**Figure S44.** <sup>13</sup>C NMR spectrum 11h.

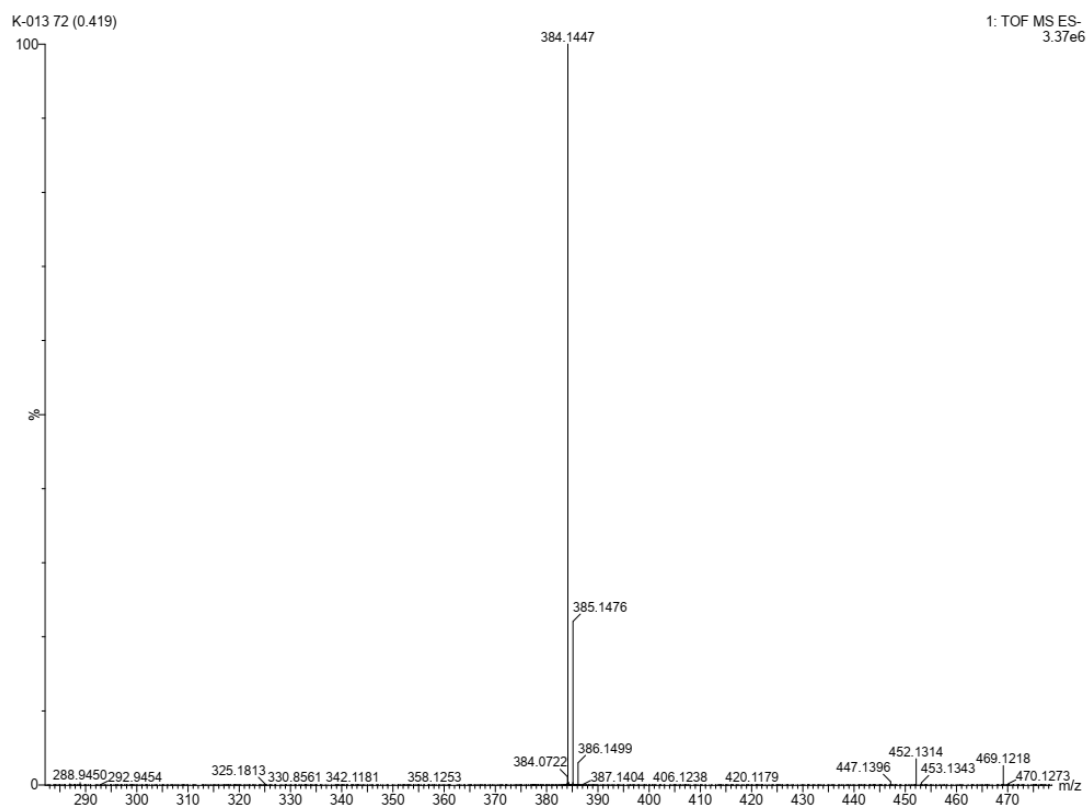

**Figure S45.** HRMS spectrum **11h**.
